# Supplementary material for: Fluorescent probes for sensitive and selective detection of pH changes in live cells in visible and near-infrared channels
Source: Royal Society of Chemistry journal article supplement (doi:10.1039/c7tb02583a), 2017-01-01
Supplement: c7tb02583a1.pdf [file c7tb02583a1.pdf]

## Supporting Information

### Fluorescent Probes for Sensitive and Selective Detection of pH Changes in Live Cells in Visible and Near-infrared Channels

Mingxi Fang,<sup>a</sup> Rashmi Adhikari,<sup>a</sup> Jianheng Bi,<sup>a</sup> Nethaniah Dorh,<sup>a</sup> Wafa Mazi,<sup>a</sup> Jianbo Wang,<sup>a</sup> Nathan Conner,<sup>a</sup> Jon Ainsley,<sup>c</sup> Tatyana G. Karabancheva-Christova,<sup>a</sup> Fen-Tair Luo,<sup>b\*</sup> Ashutosh Tiwari,<sup>a\*</sup> and Haiying Liu<sup>a\*</sup>

<sup>a</sup>Department of Chemistry, Michigan Technological University, Houghton, MI 49931, E-mail: tiwari@mtu.edu; hylu@mtu.edu

<sup>b</sup>Institute of Chemistry, Academia Sinica, Taipei, Taiwan 11529, Republic of China, E-mail: luoft@gate.sinica.edu.tw

<sup>c</sup>Department of Applied Sciences, Northumbria University, Newcastle upon Tyne NE1 8ST, UK

## CONTENTS

|                                                                                                    |        |
|----------------------------------------------------------------------------------------------------|--------|
| 1. Optical measurement method of fluorescent probes .....                                          | 2      |
| 2. <sup>1</sup> H, <sup>13</sup> C NMR and HRMS spectra of fluorescent probes A, B, C, D, E.....   | 3-10   |
| 3. <sup>1</sup> H, <sup>13</sup> C NMR and HRMS spectra of intermediate compounds 3, 6 and 8 ..... | 10-14  |
| 4. The response of probe <b>B</b> to common anions .....                                           | 15     |
| 5. The response of probe <b>B</b> to amino acids and biothiols .....                               | 15     |
| 6. Computation results of probes <b>A-E</b> .....                                                  | 16- 20 |
| 7. In-vitro cell imaging and intracellular detection of pH by using fluorescent probes .....       | 21-29  |
| 8. References.....                                                                                 | 29     |

## Optical Measurement:

The UV-Vis absorption spectra of fluorescent probes **A**, **B**, **C**, **D** and **E** for pH dependency, selectivity, photostability and solvent effect measurements were collected in the range from 300 to 800 nm with increments of 1 nm. Their corresponding fluorescence spectra were collected at the excitation wavelength of 470 nm, 490 nm, and 580 nm for fluorescent probes **A**, **B**, **C**, **D** and **E** with increments of 1 nm, respectively. The excitation and emission slit widths were set up to 5 nm. The concentration of the dye in each sample is 5  $\mu\text{M}$ . The quantum yields were calculated according to reference reported<sup>1</sup>. Fluorescence quantum yields were calculated by measuring fluorescence of a fluorophore of known quantum yield, which was Hunan dye dissolved in Ethyl Alcohol<sup>2</sup>, with the same experimental parameters (excitation wavelength and slit width). Both samples and references were freshly prepared under identical conditions. The fluorescence quantum yields were calculated using the following equation:

$$\Phi_X = \Phi_{st}(Grad_X/Grad_{st})(\eta_X^2/\eta_{st}^2)$$

Where the subscripts 'st' and 'X' represent standard and testing sample, respectively,  $\Phi$  stands for the fluorescence quantum yield, "Grad" is the gradient from the plot of integrated fluorescence intensity versus absorbance and  $\eta$  is the refractive index of the solvent.

## Determination of $pK_a$ by fluorometric titration

The constants  $K_a$  of fluorescent probes **A**, **B**, **C**, **D** and **E** related to spirolactam ring opening were determined by fluorometric titration as a function of pH in buffers with different pH values. The expression of the steady-state fluorescence intensity  $F$  as a function of the proton ion concentration has been extended for the case of a  $n:1$  complex between  $H^+$  and a fluorescent probe, which is expressed by the equation below:<sup>3</sup>

$$F = \frac{F_{min}[H^+]^n + F_{max}K_a}{K_a + [H^+]^n}$$

$F_{min}$  and  $F_{max}$  stand for the fluorescence intensities at maximal and minimal  $H^+$  concentrations, respectively, and  $n$  is apparent stoichiometry of  $H^+$  binding to the probe which causes the fluorescence change. Nonlinear fitting of equation expressed above to the fluorescence titration data recoded as a function of  $H^+$  concentration with  $K_a$  and  $n$  as free adjustable parameters yields the estimated apparent constant of  $K_a$ .

# <sup>1</sup>H and <sup>13</sup>C NMR spectra of fluorescent probes A, B and C

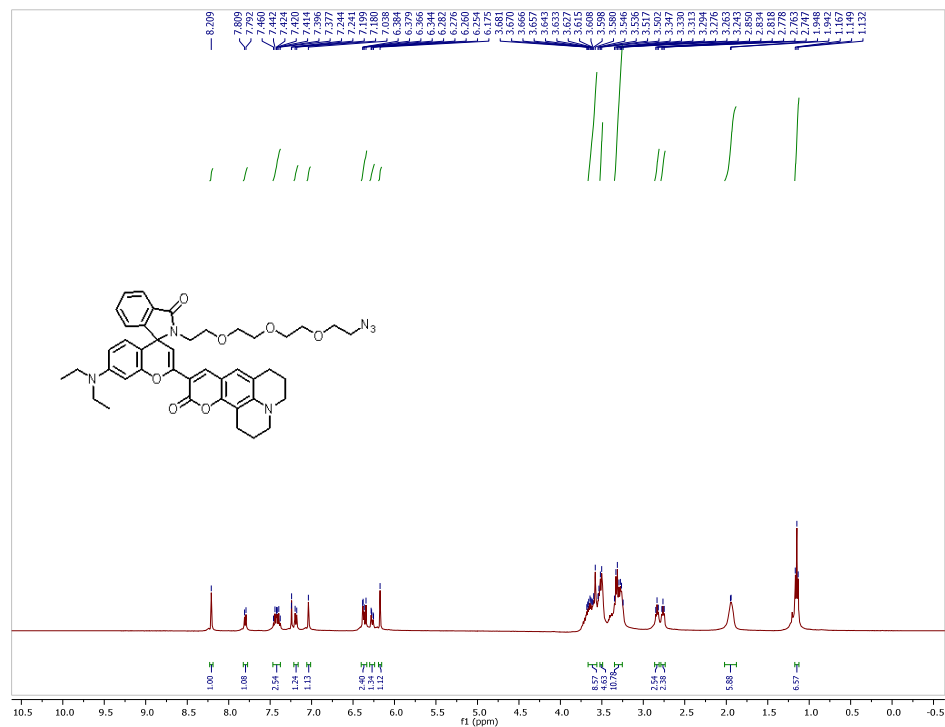

**Figure S1.** <sup>1</sup>H NMR spectrum of fluorescent probe A in CDCl<sub>3</sub> solution.

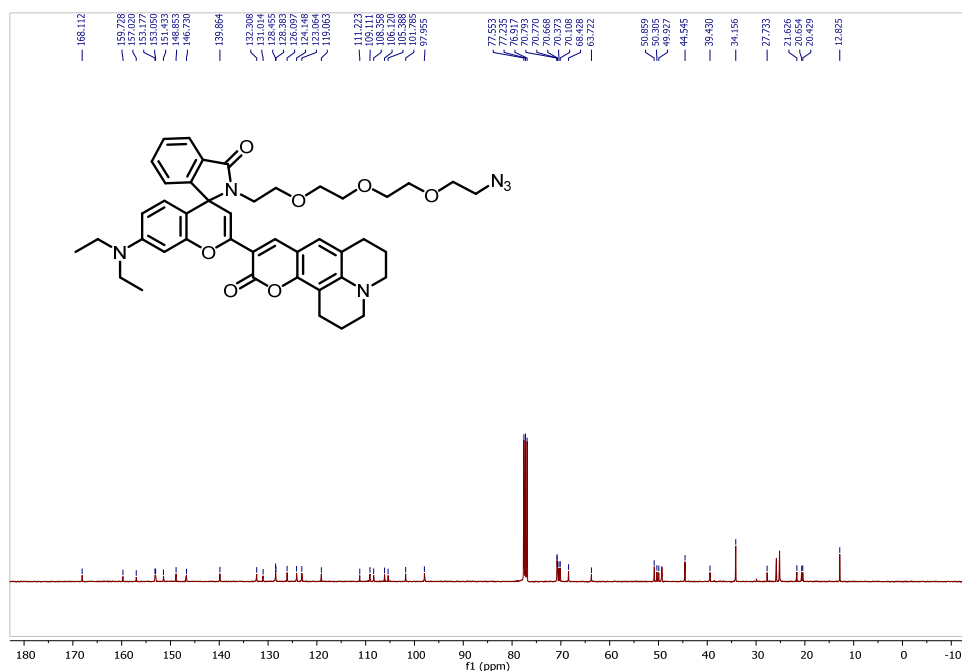

**Figure S2.** <sup>13</sup>C NMR spectrum of fluorescent probe A in CDCl<sub>3</sub>



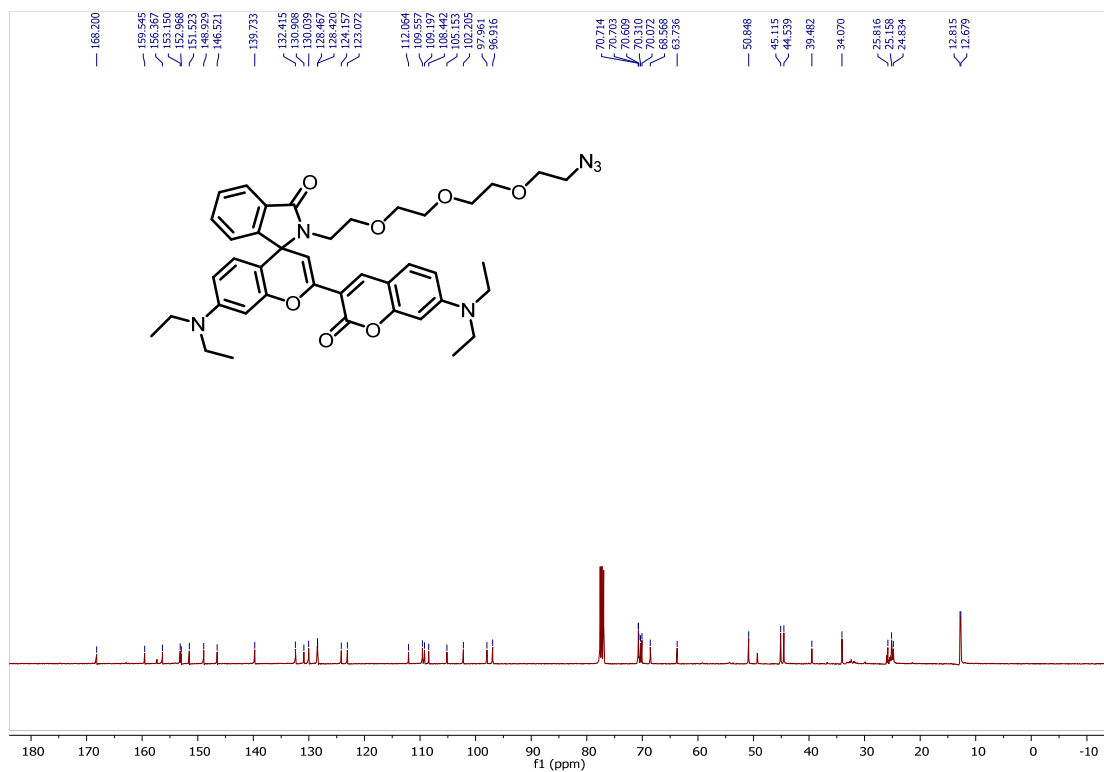

**Figure S5.**  $^{13}\text{C}$  NMR spectrum of fluorescent probe **B** in  $\text{CDCl}_3$  solution.

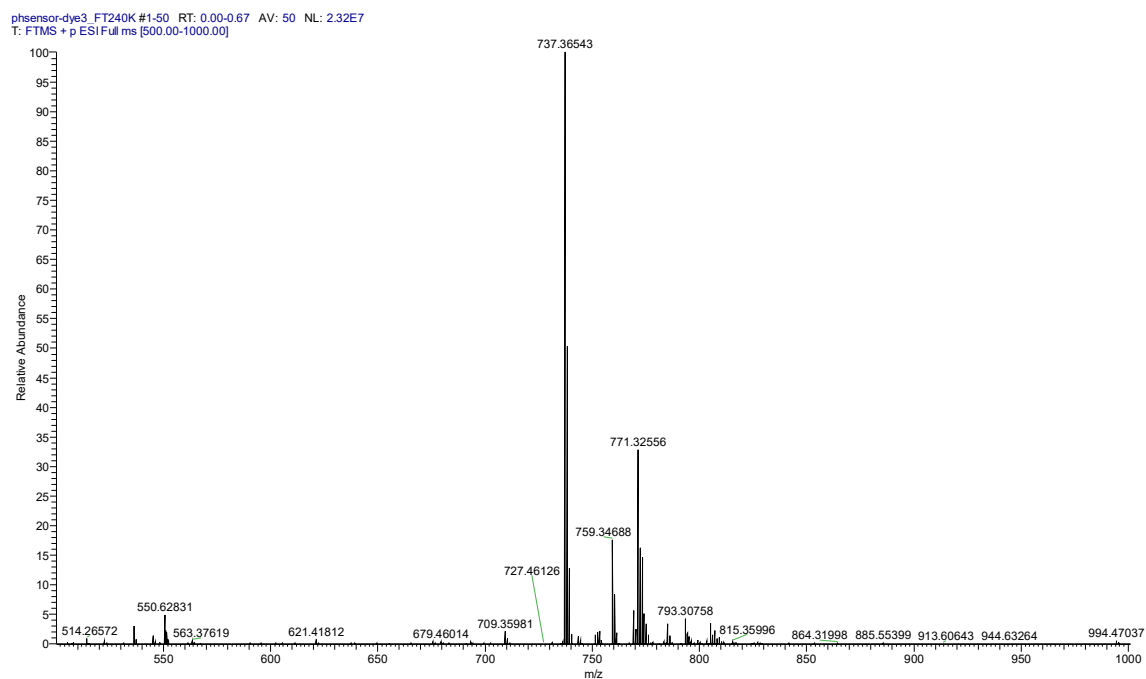

**Figure S6.** HRMS spectrum of fluorescent probe **B**.

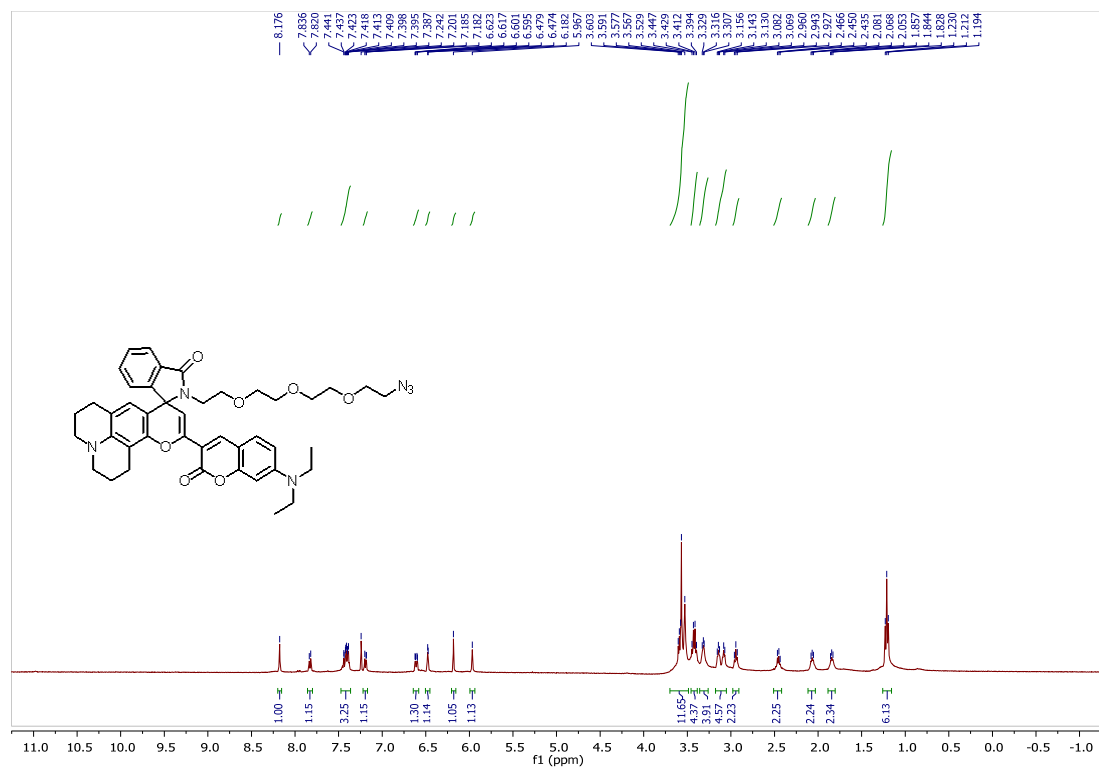

**Figure S7.** <sup>1</sup>H NMR spectrum of fluorescent probe **C** in CDCl<sub>3</sub> solution.

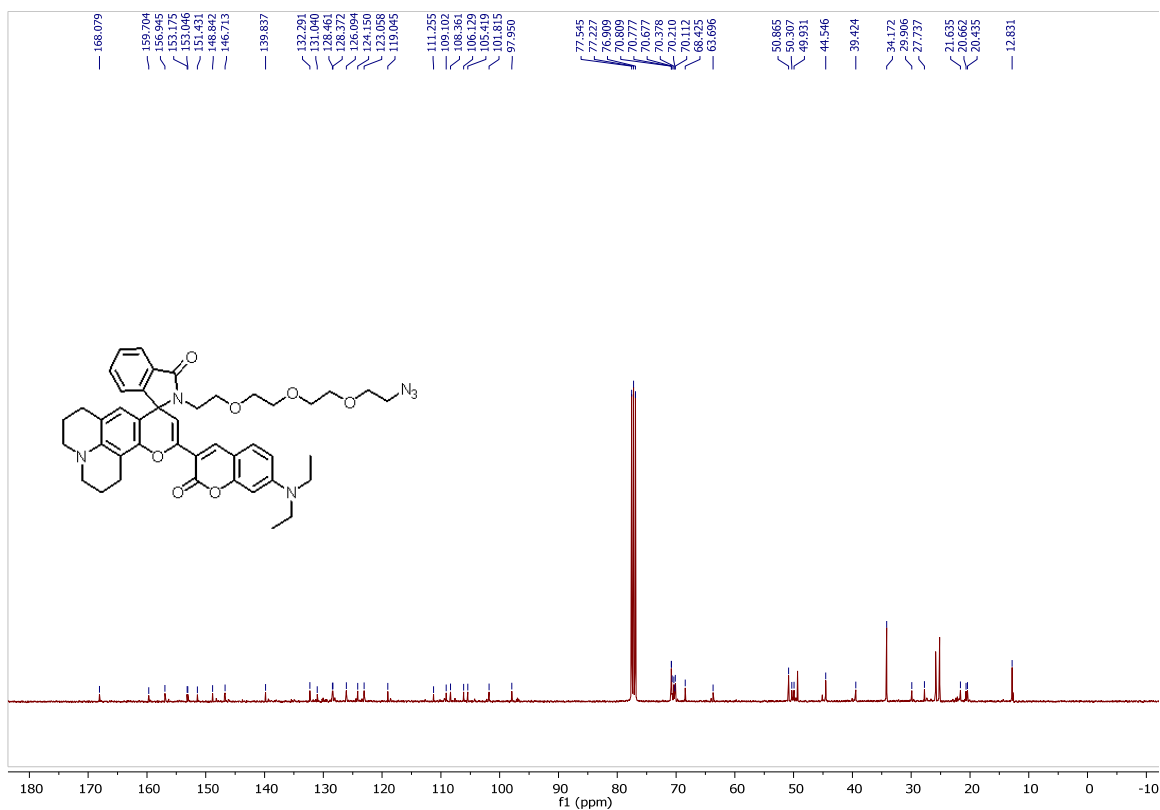

**Figure S8.** <sup>13</sup>C NMR spectrum of fluorescent probe **C** in CDCl<sub>3</sub> solution.

phsensor-dye4\_240K #1-50 RT: 0.01-0.68 AV: 50 NL: 1.14E7  
T: FTMS + p ESI Full ms [500.00-1000.00]

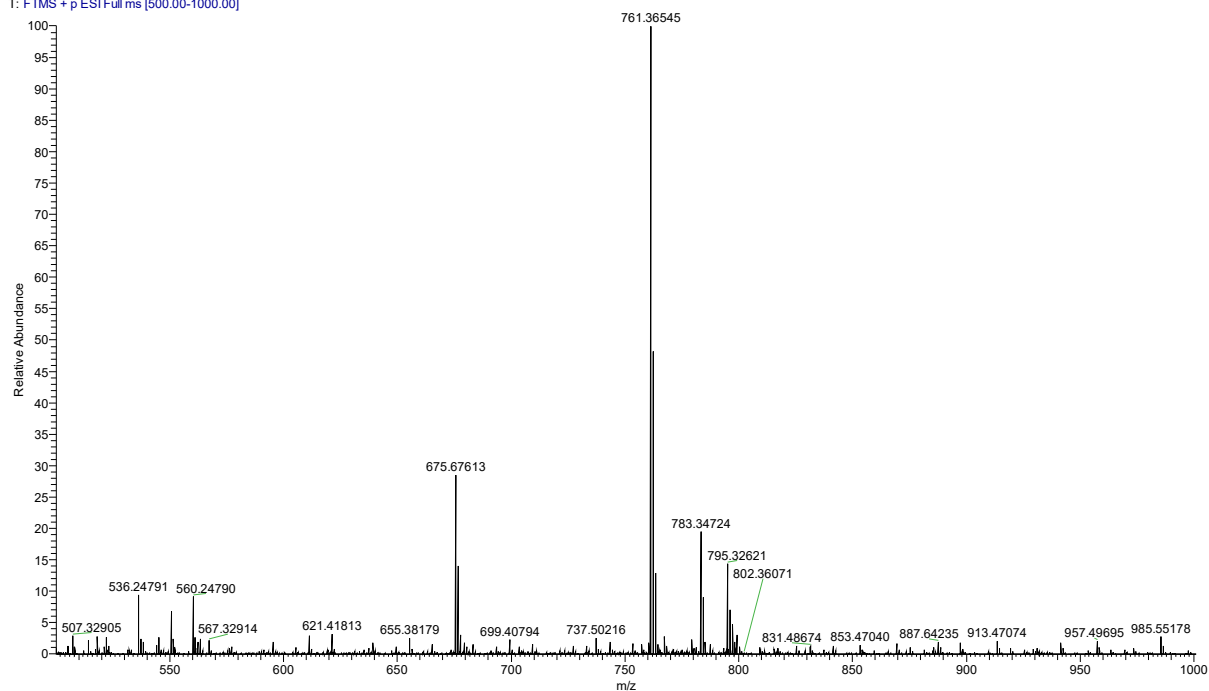

**Figure S9.** HRMS spectrum of fluorescent probe C.

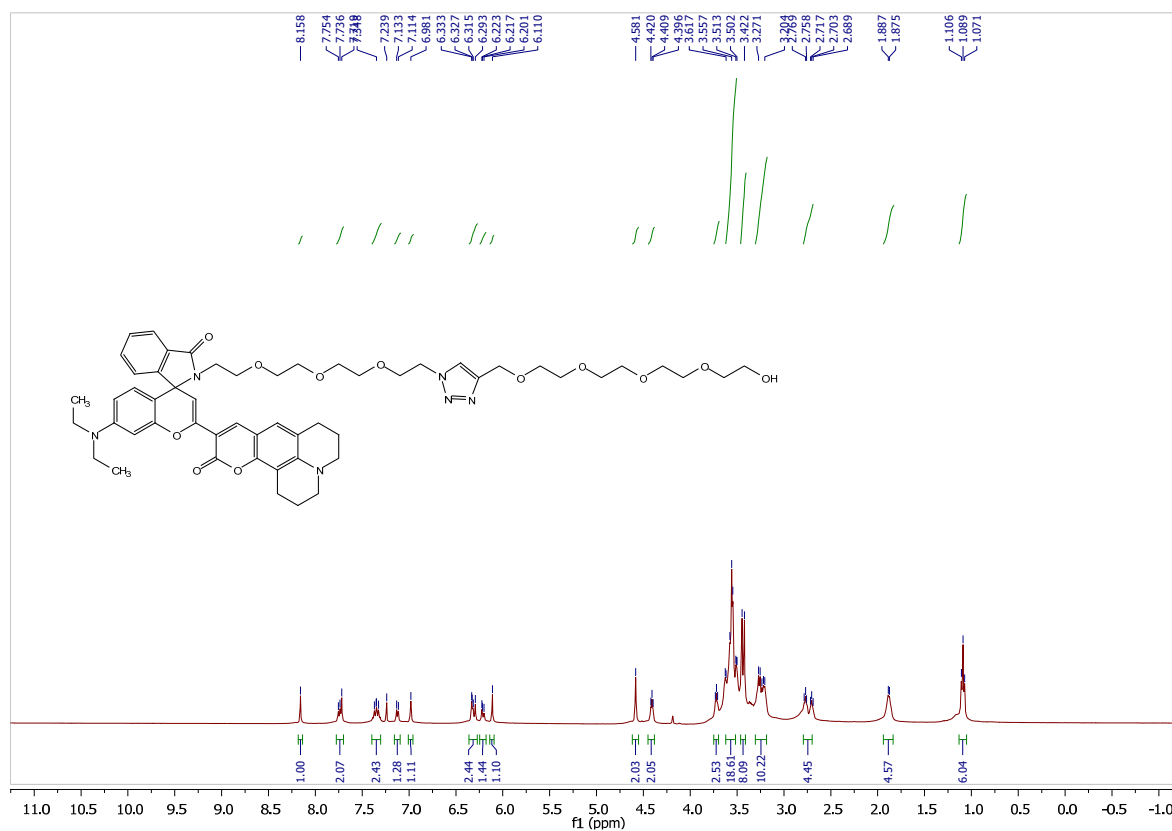

**Figure S10.** <sup>1</sup>H NMR spectrum of fluorescent probe D in CDCl<sub>3</sub> solution.

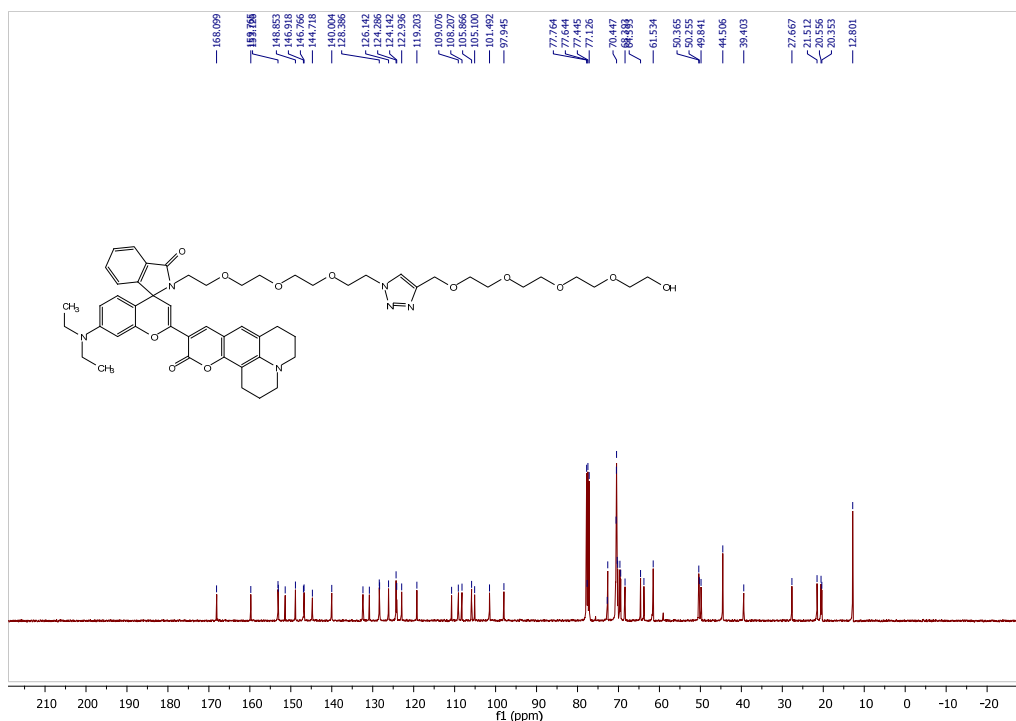

**Figure S11.**  $^{13}\text{C}$  NMR spectrum of fluorescent probe **D** in  $\text{CDCl}_3$  solution.

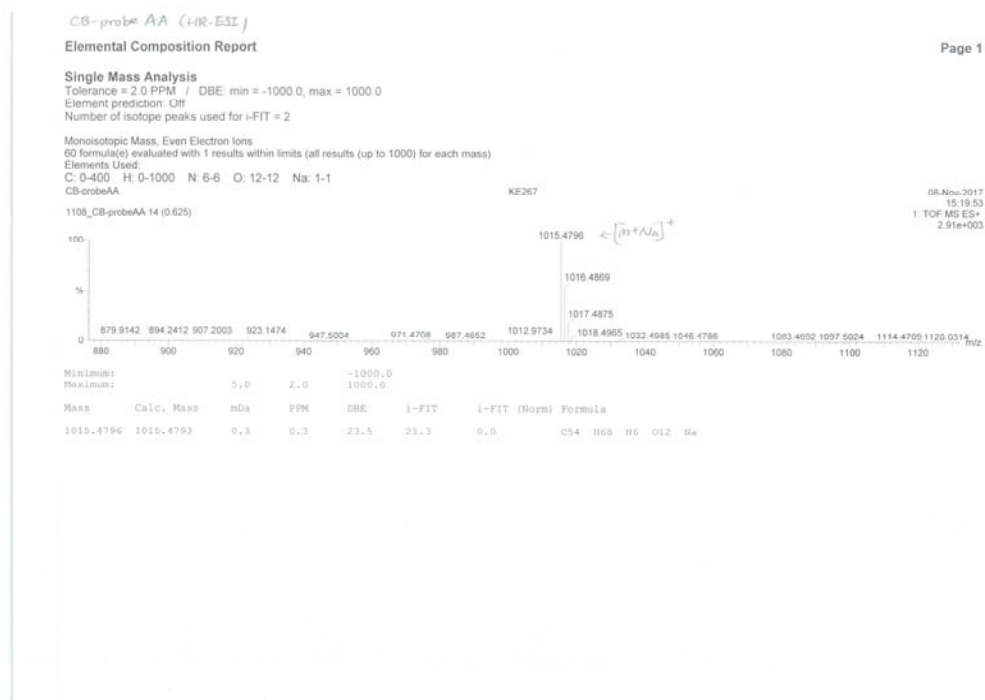

**Figure S12.** HRMS spectrum of fluorescent probe **D**.



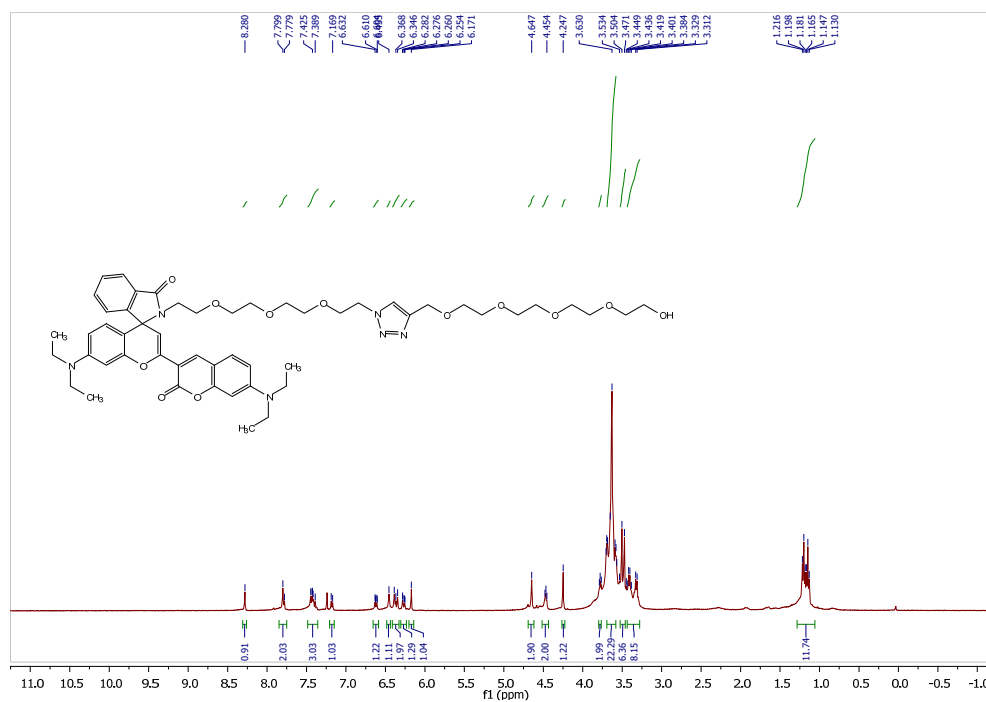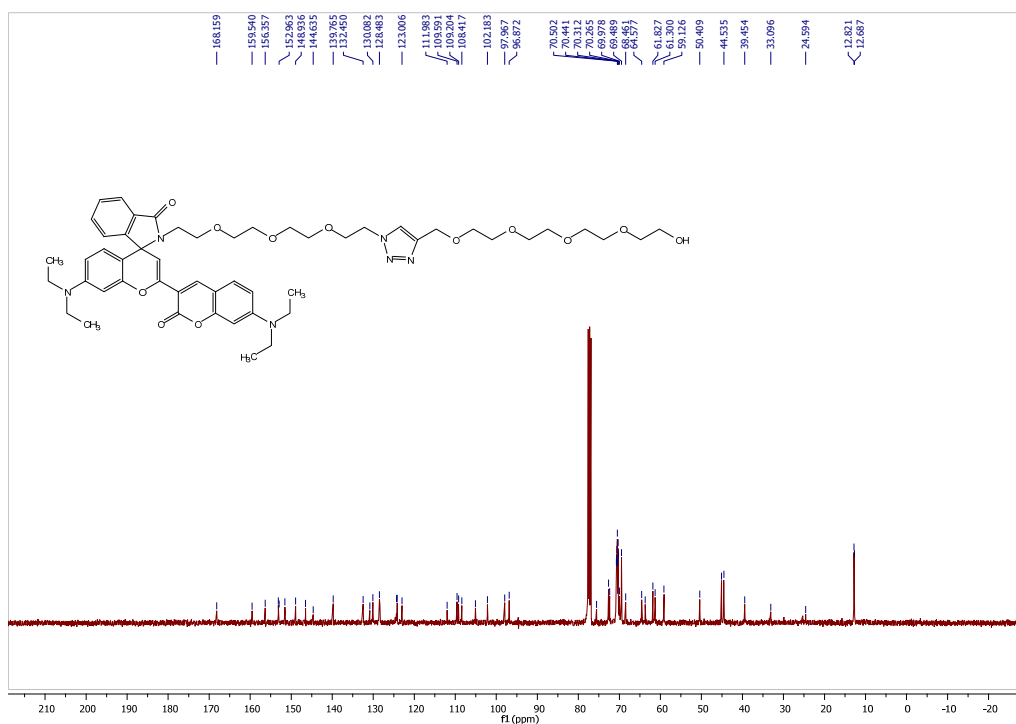

## Single Mass Analysis

Tolerance = 2.0 PPM / DBE: min = -1000.0, max = 1000.0

Element prediction: Off

Number of isotope peaks used for i-FIT = 2

Monoisotopic Mass, Even Electron ions

58 formula(e) evaluated with 1 results within limits (all results (up to 1000) for each mass)

Elements Used:

C: 0-400 H: 0-1000 N: 6-6 O: 12-12 Na: 1-1

Cib-24

1025\_Cib-24\_3\_20 (0.873) Cm (20.21)

KE267

 $[M+Na]^+$ 

25-Oct-2017

15:36:41

1: TOF MS ES+

8.15e+001

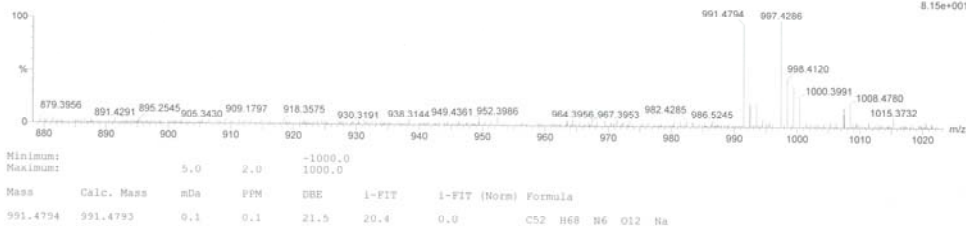

Figure S15. HRMS spectrum of fluorescent probe E.

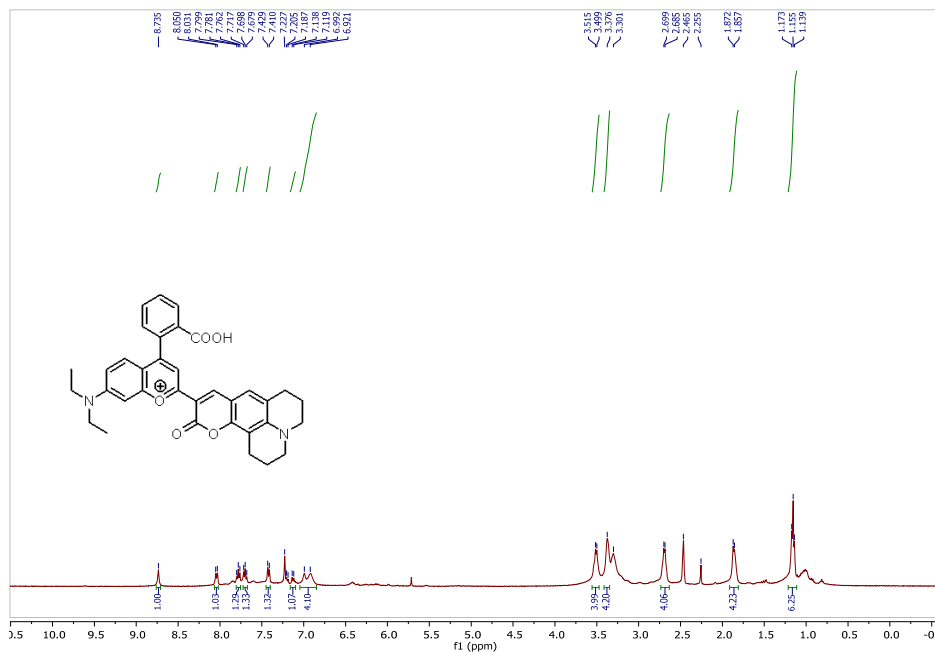Figure S16.  $^1\text{H}$  NMR spectrum of compound 3 in DMSO solution.

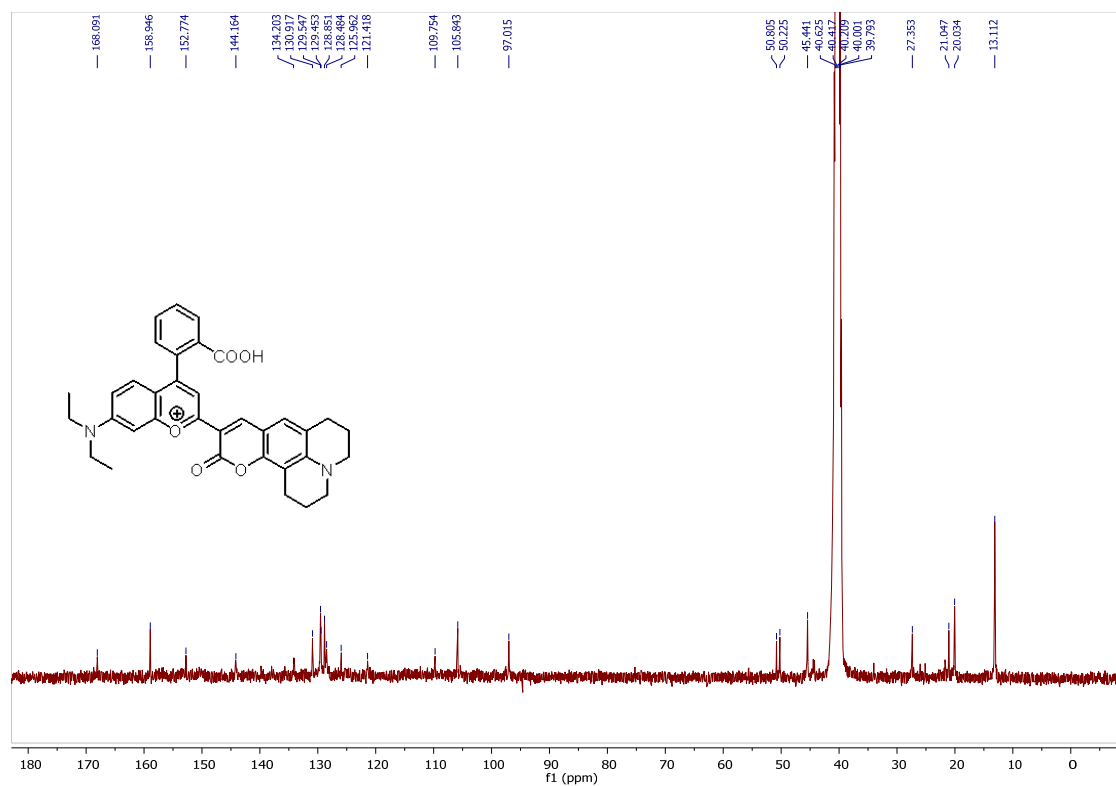

**Figure S17.** <sup>13</sup>C NMR spectrum of compound **3** in DMSO solution.

dye2-intermediate-561 #1-50 RT: 0.00-0.70 AV: 50 NL: 7.09E6  
T: FTMS + p ESI Full ms [400.00-700.00]

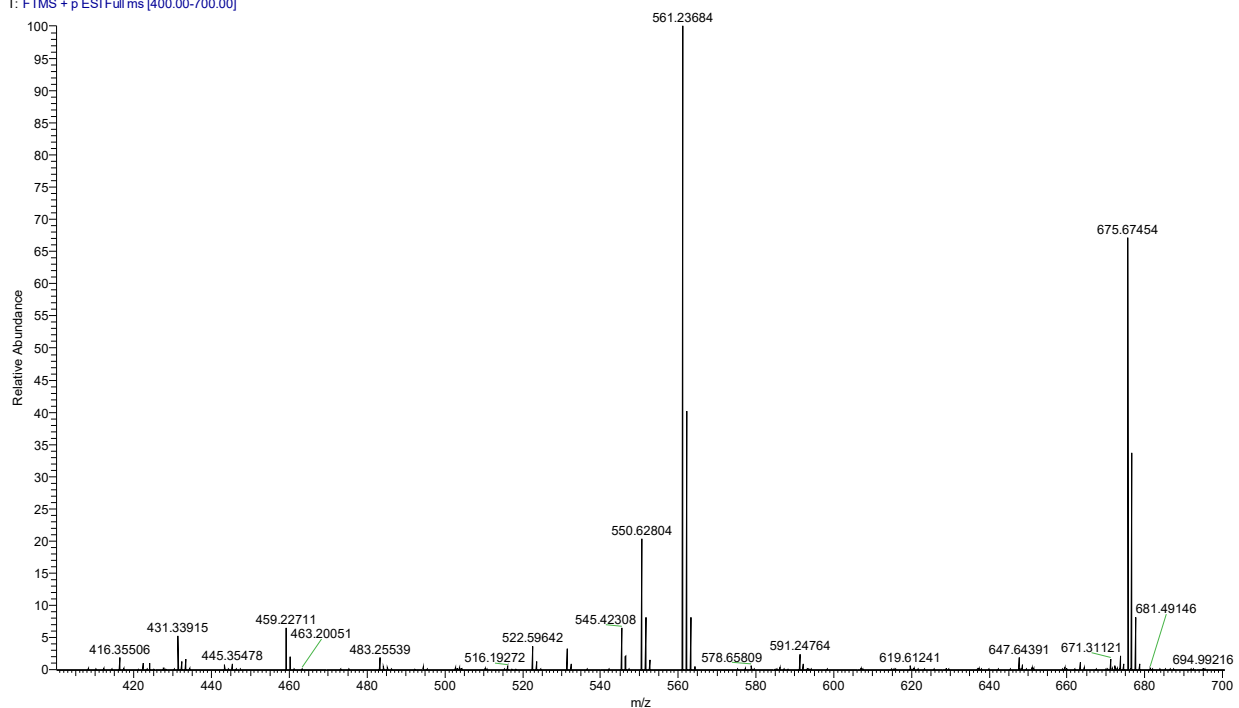

**Figure S18.** HRMS spectrum of compound **3**.

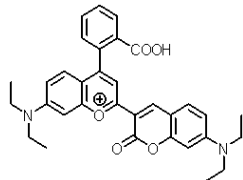

**Figure S19.**  $^1\text{H}$  NMR spectrum of compound **6** in DMSO solution.

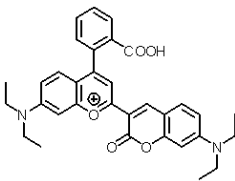

**Figure S20.**  $^{13}\text{C}$  NMR spectrum of compound **6** in DMSO solution.

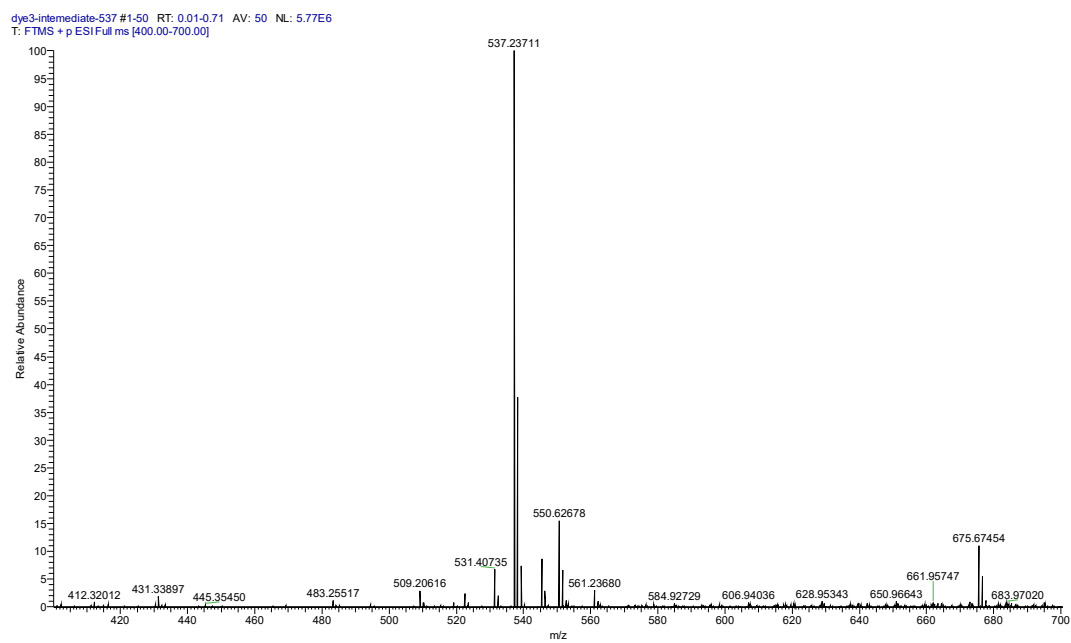

**Figure S21.** HRMS spectrum of compound **6**.

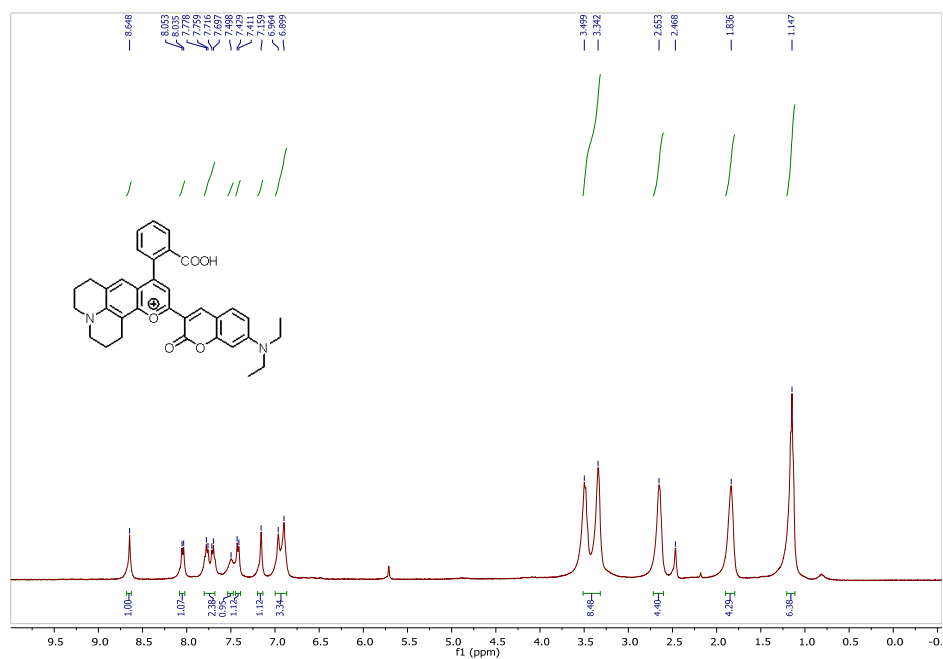

**Figure S22.**  $^1\text{H}$  NMR spectrum of compound **8** in DMSO solution.

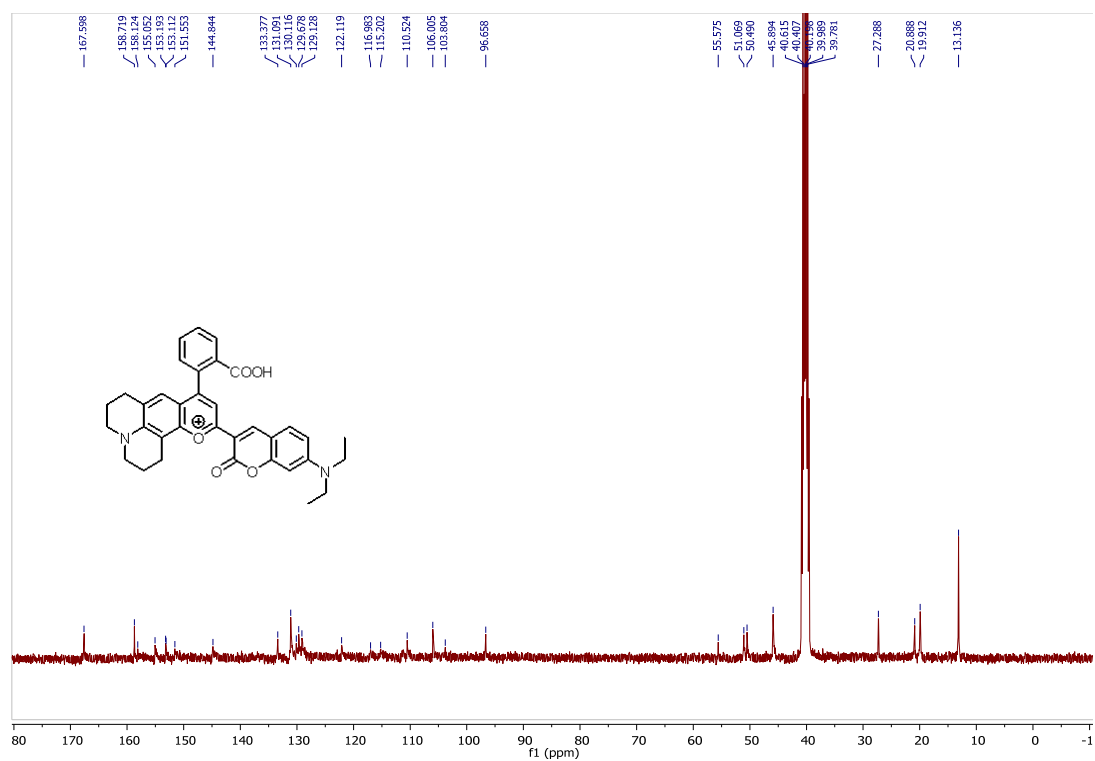

Figure S23. <sup>13</sup>C NMR spectrum of compound **8** in DMSO solution.

dye4intermediate-optimized #1-50 RT: 0.01-0.75 AV: 50 NL: 4.29E6  
T: FTMS + p ESI Full ms [400.00-600.00]

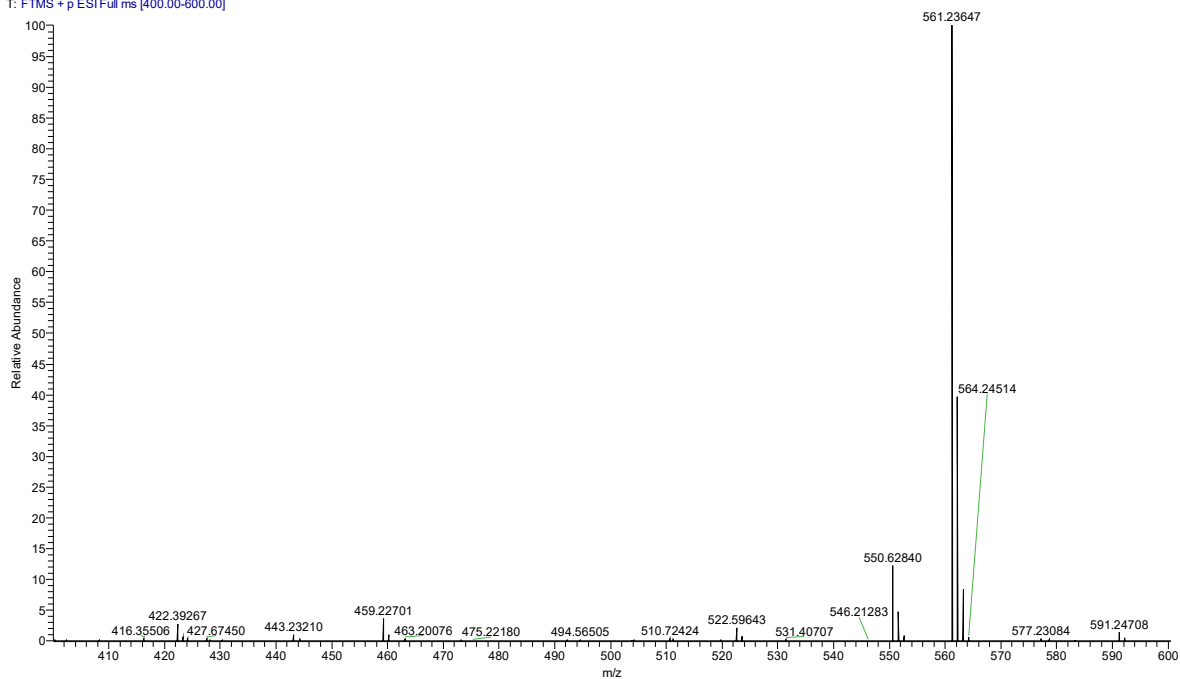

Figure S24. HRMS spectrum of compound **8**.

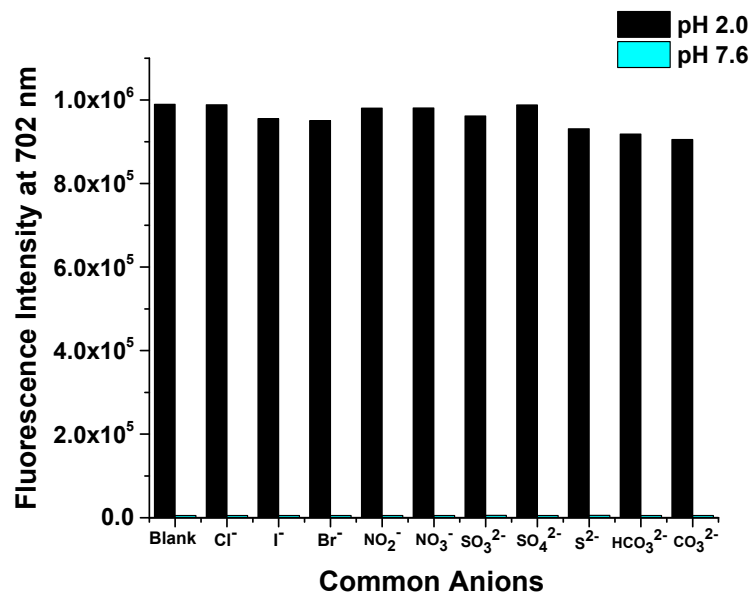

**Figure S25.** The response of probe **B** to 200  $\mu$ M common anions in 5 mM citric phosphate buffers with different pH values containing 40% ethanol

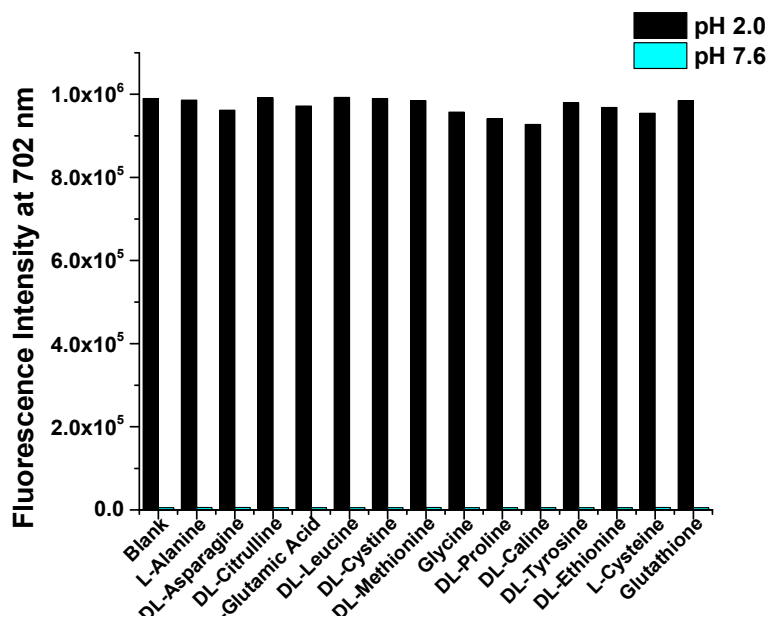

**Figure S26.** The fluorescence responses of probe **B** to 50  $\mu$ M amino acids and biothiols in 5 mM citric phosphate buffers with different pH values containing 40% ethanol

Probe A in basic condition

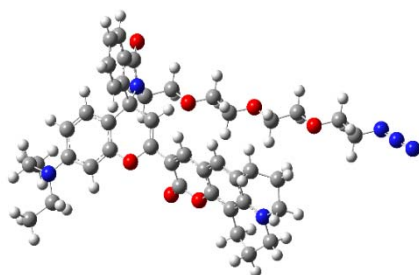

Probe A in acidic condition

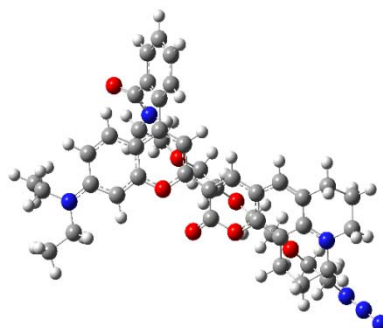

HOMO of probe A in basic condition

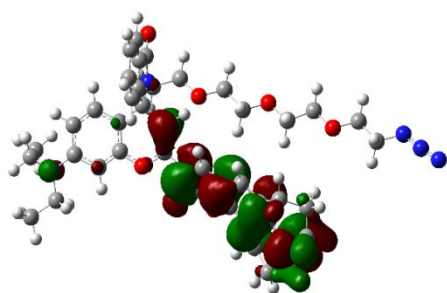

HOMO of probe A in acidic condition

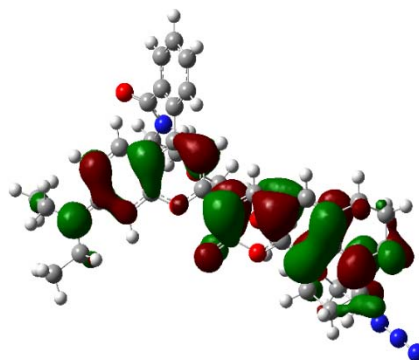

LUMO of probe A in basic condition

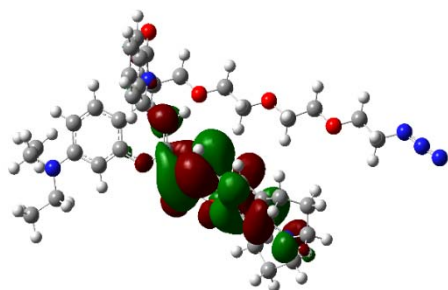

LUMO of probe A in acidic condition

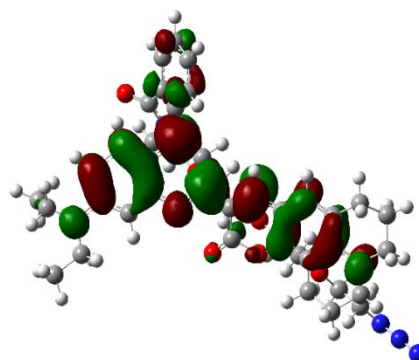

**Figure S27:** Optimized structures of the protonated and deprotonated forms of fluorescent probe A , with atoms colored as follows carbon is grey, hydrogen is white, nitrogen is blue and oxygen is red. Visualizations of their HOMO and LUMO orbitals are colored by wavefunction in either red or green.



Probe C in basic condition

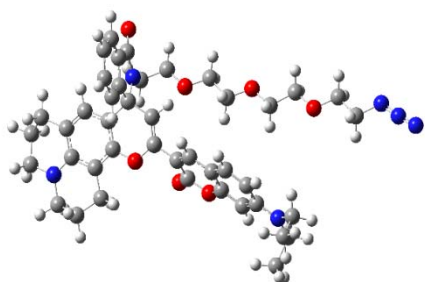

Probe C in acidic condition

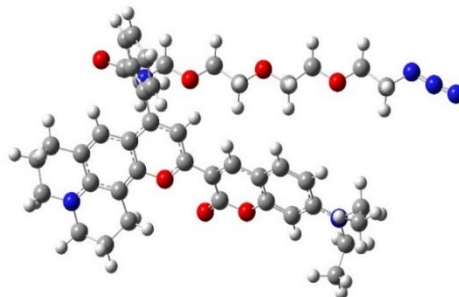

HOMO of probe C in basic condition HOMO of probe C in acidic condition

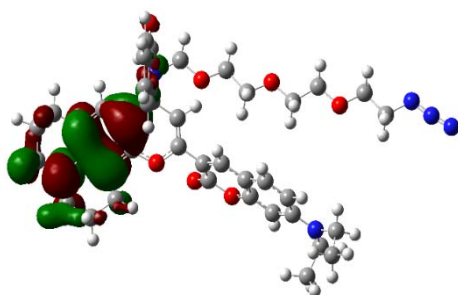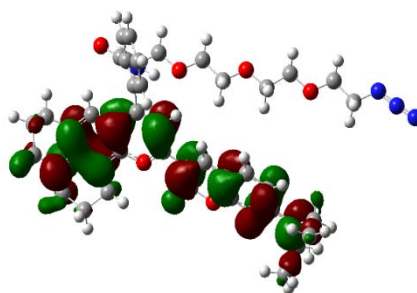

LUMO of probe C in basic

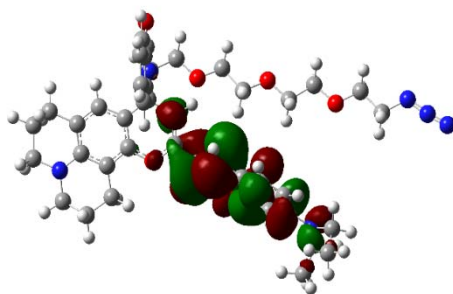

LUMO of probe C in acidic condition

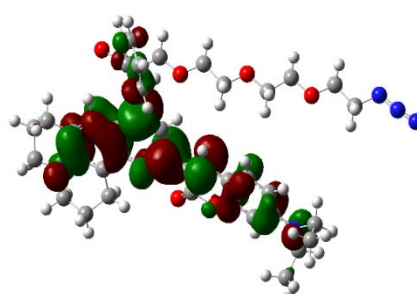

**Figure S28:** Optimized structures of protonated (right) and deprotonated (left) forms of fluorescent probe C, with atoms colored as follows: carbon -grey, hydrogen - white, nitrogen -blue and oxygen - red. Visualizations of their HOMO and LUMO orbitals are colored by wavefunction in either red or green.

| Probe               | HOMO<br>Energy (eV) | LUMO<br>Energy (eV) | HOMO-LUMO<br>Energy<br>difference (eV) |
|---------------------|---------------------|---------------------|----------------------------------------|
| A Deprotonated      | -0.1882             | -0.0608             | 0.1274                                 |
| <b>A Protonated</b> | <b>-0.2021</b>      | <b>-0.1141</b>      | <b>0.0880</b>                          |
| B Deprotonated      | -0.1941             | -0.0645             | 0.1296                                 |
| <b>B Protonated</b> | <b>-0.2081</b>      | <b>-0.1160</b>      | <b>0.0922</b>                          |
| C Deprotonated      | -0.1810             | -0.0634             | 0.1176                                 |
| <b>C Protonated</b> | <b>-0.2036</b>      | <b>-0.1119</b>      | <b>0.0917</b>                          |

**Table 1:** The calculated HOMO and LUMO energy as well as HOMO-LUMO energy differences of the fluorescent probes **A**, **B** and **C** in both opened (protonated) and closed (deprotonated) spirolactam ring forms.

| Probe               | Excitation Energy<br>Wavelength (nm) | Oscillator<br>Strength |
|---------------------|--------------------------------------|------------------------|
| A Deprotonated      | 392.2                                | 0.6798                 |
| <b>A Protonated</b> | <b>578.3</b>                         | <b>1.1863</b>          |
| B Deprotonated      | 397.8                                | 0.0415                 |
| <b>B Protonated</b> | <b>558.3</b>                         | <b>1.1952</b>          |
| C Deprotonated      | 444.8                                | 0.0102                 |
| <b>C Protonated</b> | <b>566.3</b>                         | <b>1.0661</b>          |

**Table 2:** Calculated excitation energy and oscillator strengths for the fluorescent probes **A**, **B** and **C** in both opened (protonated) and closed (deprotonated) spirolactam ring forms.

| Compound            | HOMO Energy (eV) | LUMO Energy (eV) | HOMO-LUMO Gap Energy (eV) |
|---------------------|------------------|------------------|---------------------------|
| D Deprotonated      | -0.1881          | -0.0608          | 0.1273                    |
| <b>D Protonated</b> | <b>-0.2023</b>   | <b>-0.1142</b>   | <b>0.0881</b>             |
| E Deprotonated      | -0.1944          | -0.0646          | 0.1298                    |
| <b>E Protonated</b> | <b>-0.2081</b>   | <b>-0.1159</b>   | <b>0.0922</b>             |

**Table 3:** The calculated HOMO and LUMO energy as well as HOMO-LUMO gap energies of fluorescent probes D and E in both their opened (protonated) and closed (deprotonated) spirolactam forms.

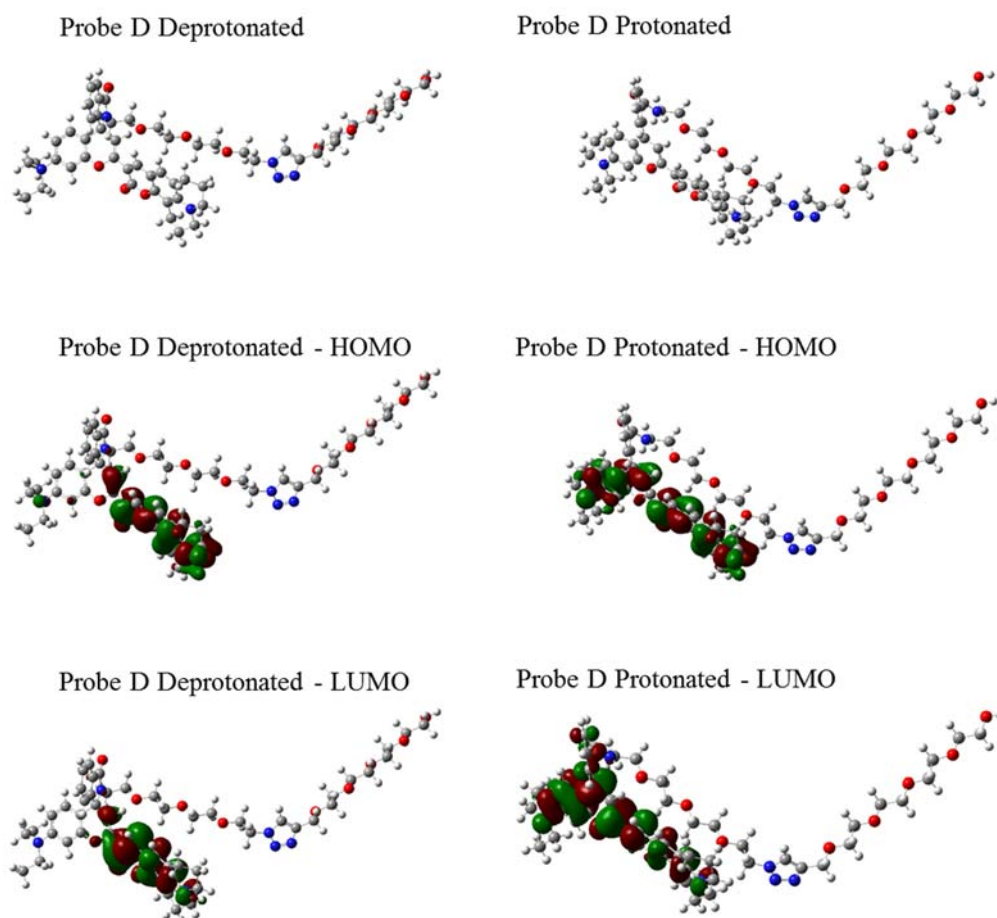

**Figure S29:** The optimized structures of the closed (deprotonated) and opened (protonated) spirolactam forms of fluorescent probe **D**, with atoms colored as follows carbon is grey, hydrogen is white, nitrogen is blue and oxygen is red. Visualizations of their HOMO and LUMO orbitals are colored by wavefunction in either red or green.

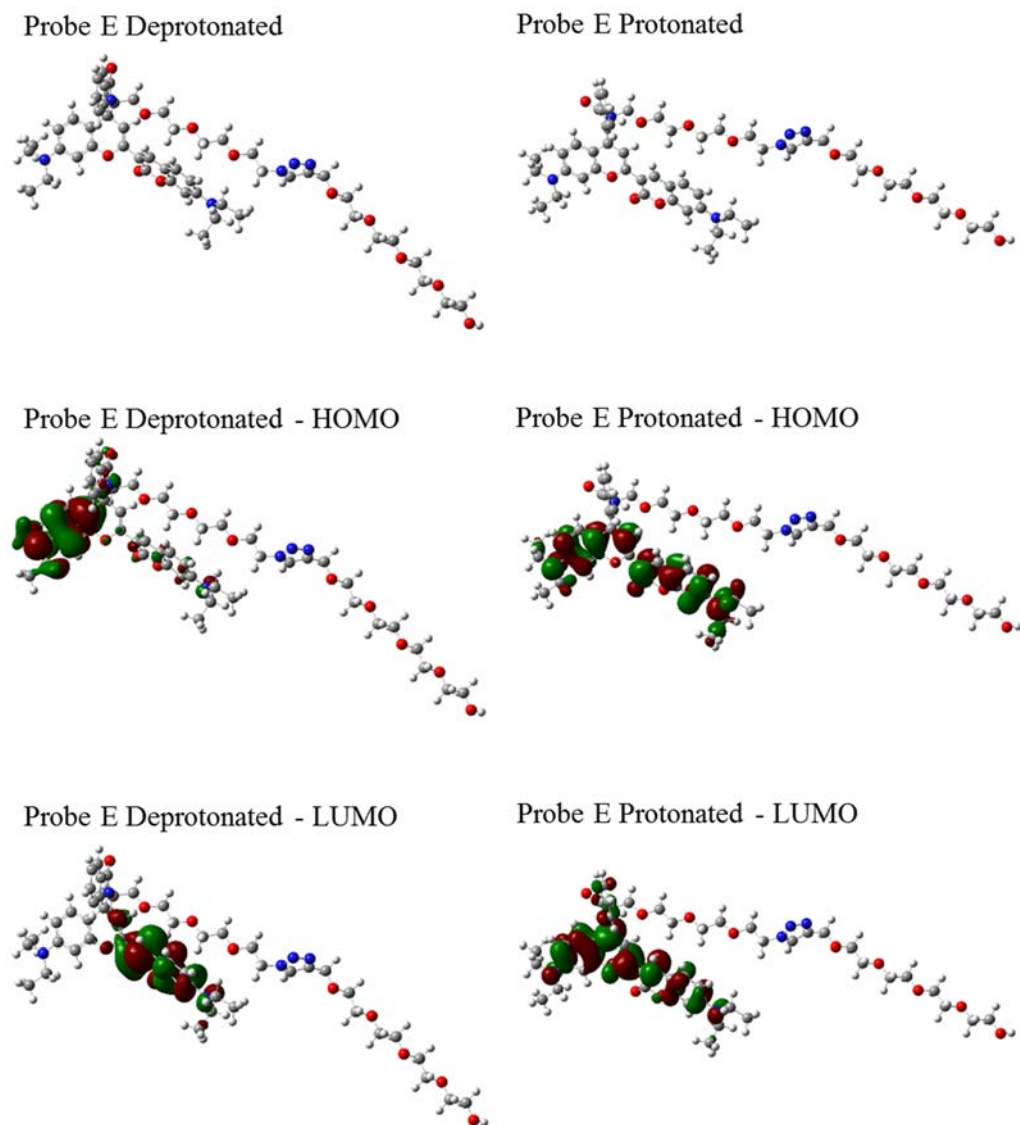

**Figure S30:** The optimized structures of the closed (deprotonated) and opened (protonated) spirolactam forms of fluorescent probe **E**, with atoms colored as follows carbon is grey, hydrogen is white, nitrogen is blue and oxygen is red. Visualizations of their HOMO and LUMO orbitals are colored by wavefunction in either red or green.

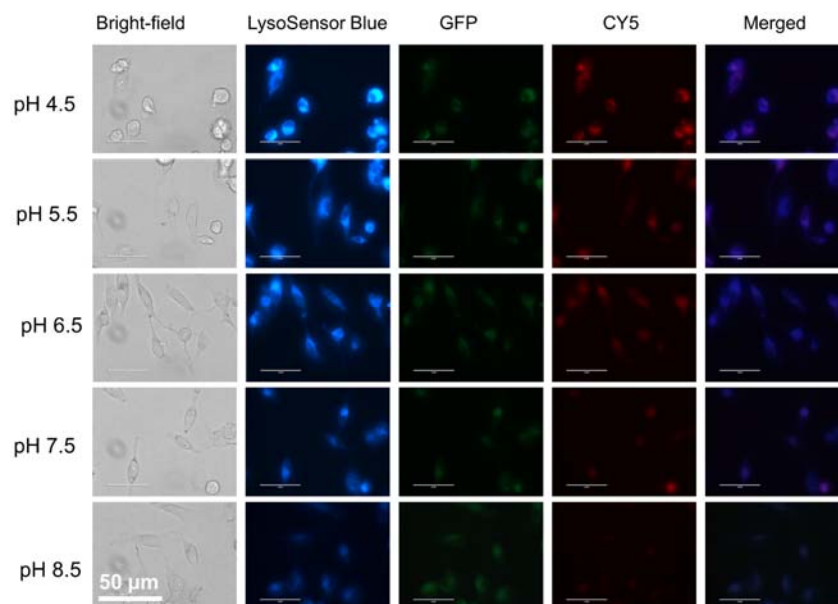

**Figure S31:** Fluorescence images of MDA-MB231 cells incubated with fluorescent probe **B**. MDA-MB231 cells were incubated with 5  $\mu$ M probe **B** at different pH values ranging from pH 4.5 to 8.5 in presence of LysoSensor blue DND-167 (2  $\mu$ M) and nigericin. Images were acquired using the inverted fluorescence microscope (AMF-4306, EVOSfl, AMG) at 60X magnification.

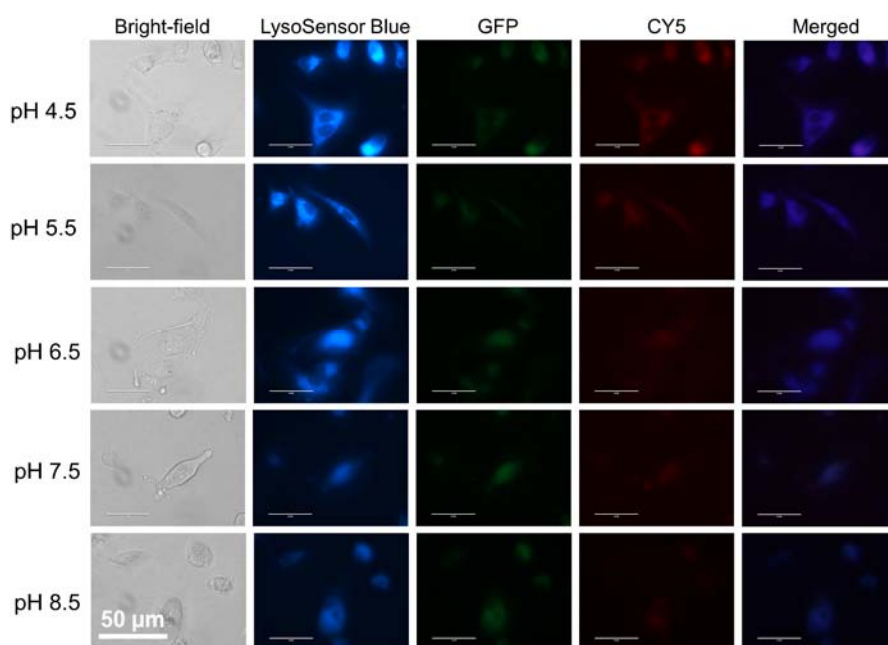

**Figure S32:** Fluorescence images of HUVEC-C cells incubated with fluorescent probe **B**. HUVEC-C cells were incubated with 5  $\mu$ M probe **B** at different pH values ranging from pH 4.5 to 8.5 in presence of LysoSensor blue DND-167 (2  $\mu$ M) and nigericin. Images were acquired using the inverted fluorescence microscope (AMF-4306, EVOSfl, AMG) at 60X magnification.

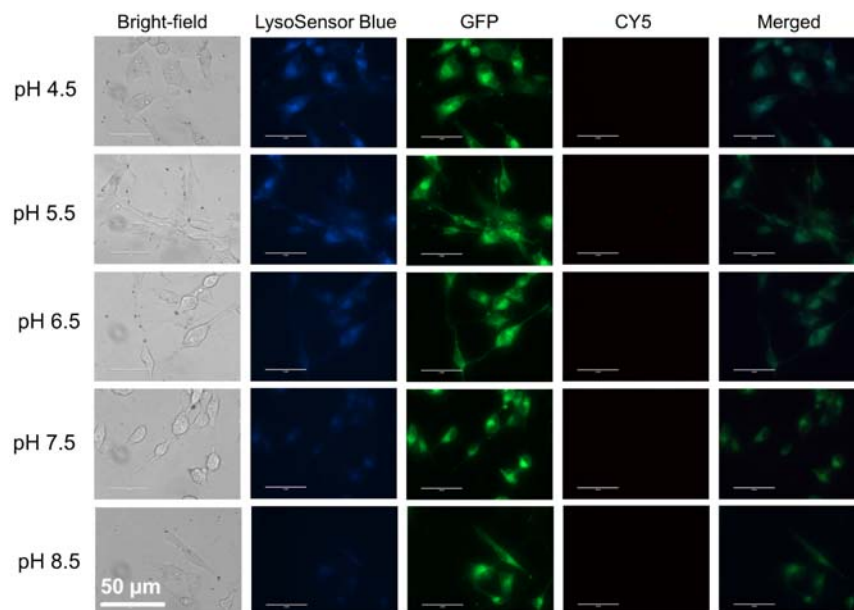

**Figure S33:** Fluorescence images of MDA-MB231 cells incubated with fluorescent probe **A**. MDA-MB231 cells were incubated with 10 μM probe **A** at different pH values ranging from pH 4.5 to 8.5 in presence of LysoSensor blue DND-167 (2 μM) and nigericin. Images were acquired using the inverted fluorescence microscope (AMF-4306, EVOSfl, AMG) at 60X magnification.

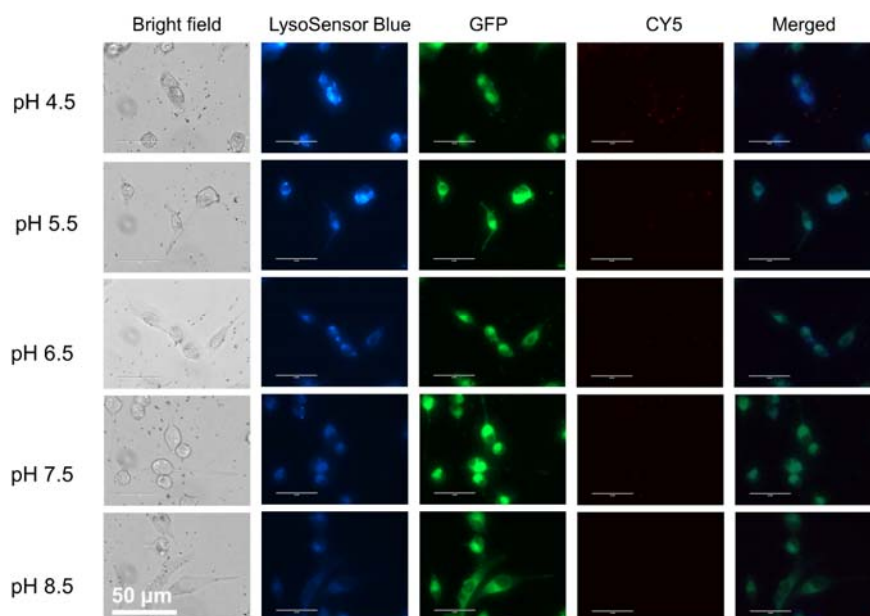

**Figure S34:** Fluorescence images of MDA-MB231 cells incubated with fluorescent probe **A**. MDA-MB231 cells were incubated with 20 μM probe **A** at different pH values ranging from pH 4.5 to 8.5 in presence of LysoSensor blue DND-167 (2 μM) and nigericin. Images were acquired using the inverted fluorescence microscope (AMF-4306, EVOSfl, AMG) at 60X magnification.

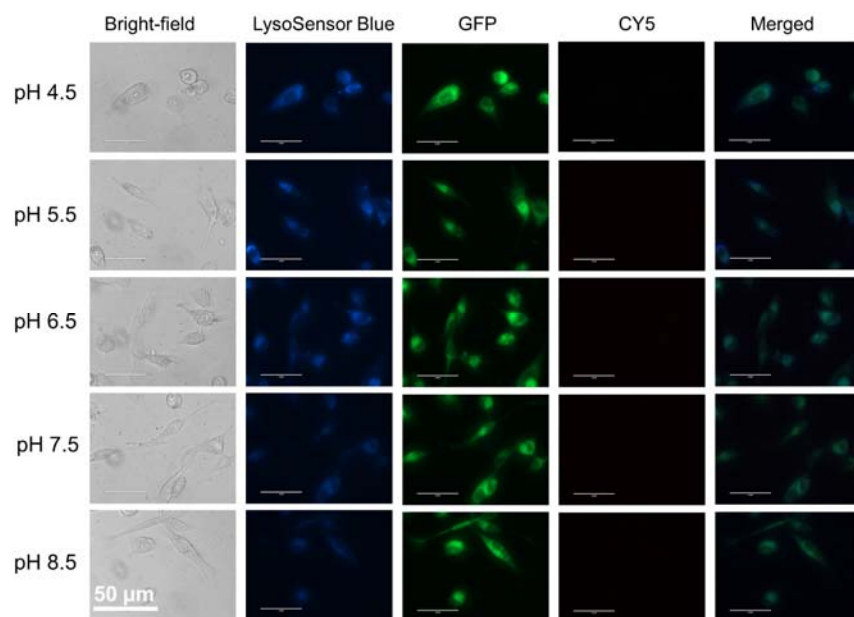

**Figure S35:** Fluorescence images of MDA-MB231 cells incubated with fluorescent probe **C**. MDA-MB231 cells were incubated with 10 μM probe **C** at different pH values ranging from pH 4.5 to 8.5 in presence of LysoSensor blue DND-167 (2 μM) and nigericin. Images were acquired using the inverted fluorescence microscope (AMF-4306, EVOSfl, AMG) at 60X magnification.

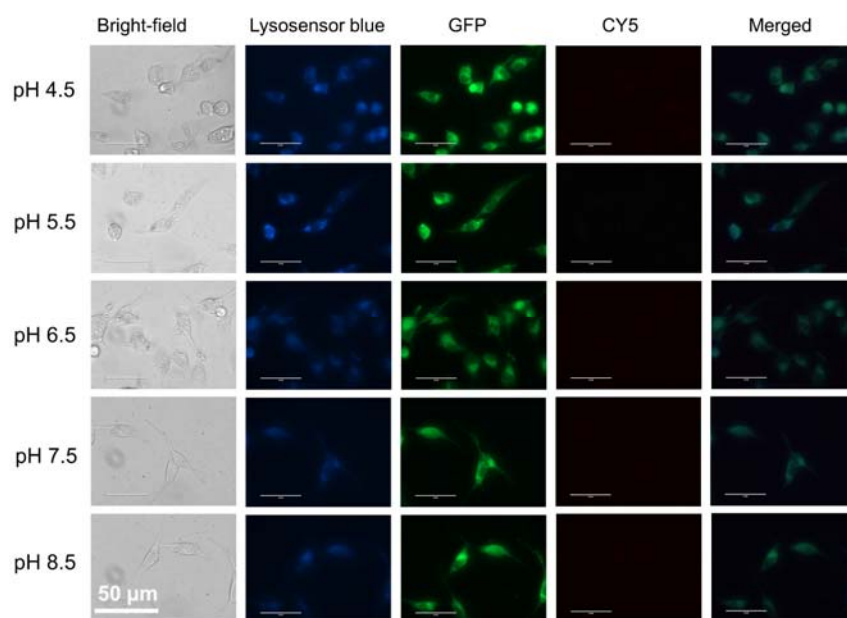

**Figure S36:** Fluorescence images of MDA-MB231 cells incubated with fluorescent probe **D**. MDA-MB231 cells were incubated with 5 μM probe **D** at different pH values ranging from pH 4.5 to 8.5 in presence of LysoSensor blue DND-167 (2 μM) and nigericin. Images were acquired using the inverted fluorescence microscope (AMF-4306, EVOSfl, AMG) at 60X magnification.



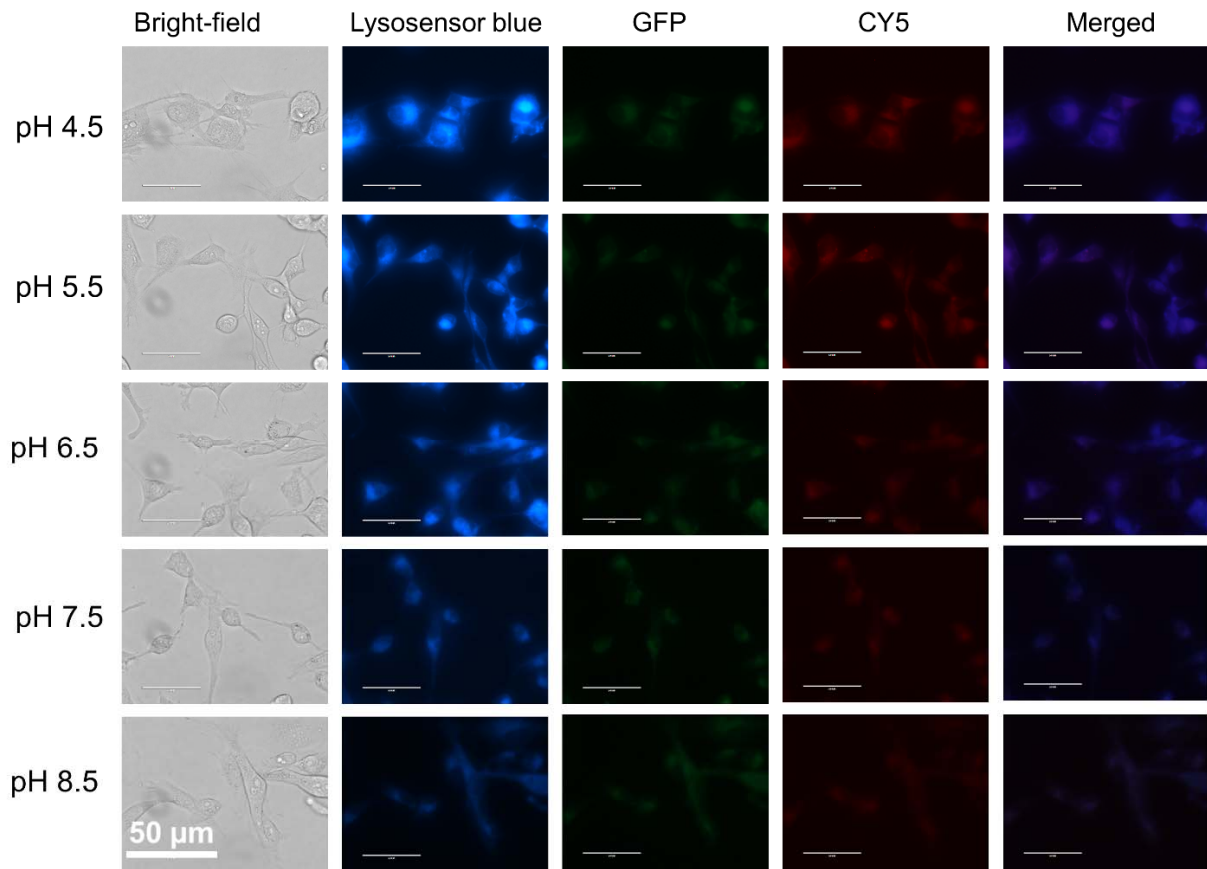

**Figure S37:** Fluorescence images of MDA-MB231 cells incubated with fluorescent probe **E**. MDA-MB231 cells were incubated with 5  $\mu$ M probe **E** at different pH values ranging from pH 4.5 to 8.5 in presence of LysoSensor blue DND-167 (2  $\mu$ M) and nigericin. Images were acquired using the inverted fluorescence microscope (AMF-4306, EVOSfl, AMG) at 60X magnification.



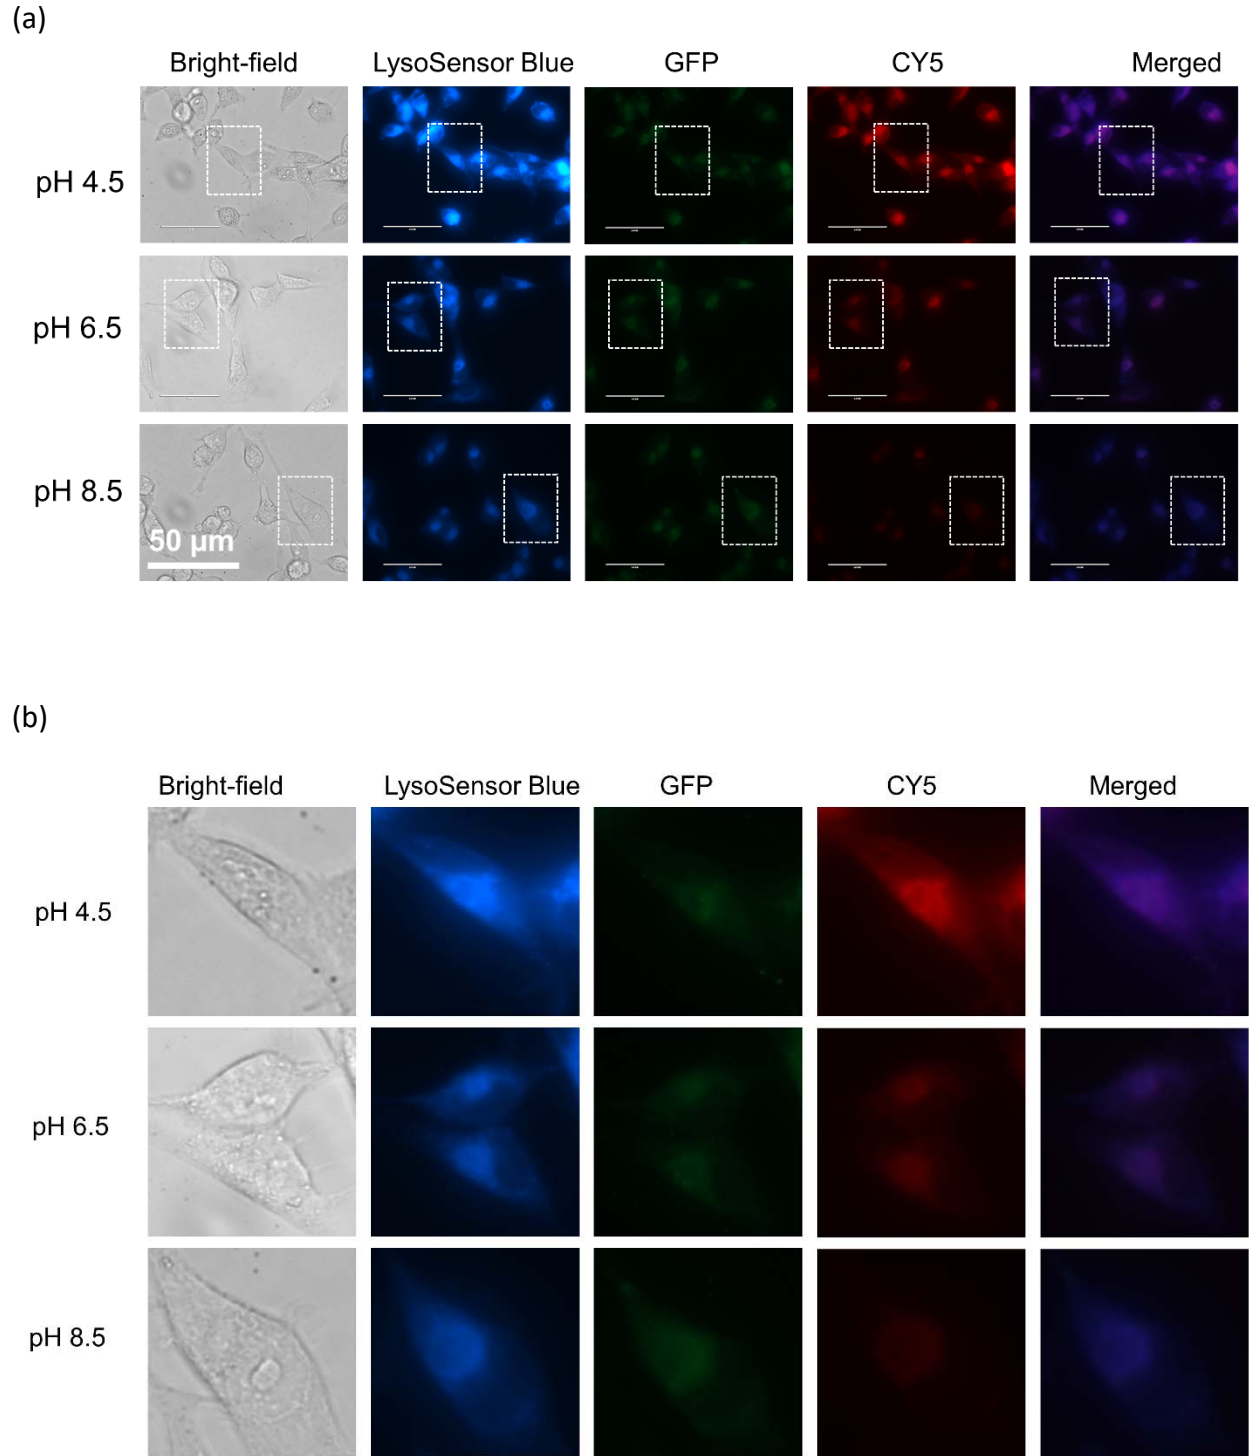

**Figure S38:** Fluorescence images of MDA-MB231 cells incubated with fluorescent probe **B**. (a) MDA-MB231 cells were incubated with 10  $\mu$ M probe **B** at different pH values ranging from pH 4.5 to 8.5 in presence of LysoSensor blue DND-167 (2  $\mu$ M) and nigericin. Images were acquired using the inverted fluorescence microscope (AMF-4306, EVOSfl, AMG) at 60X magnification. (b) Enlarged fluorescence images of MDA-MB231 cells from figure (a).

(a)

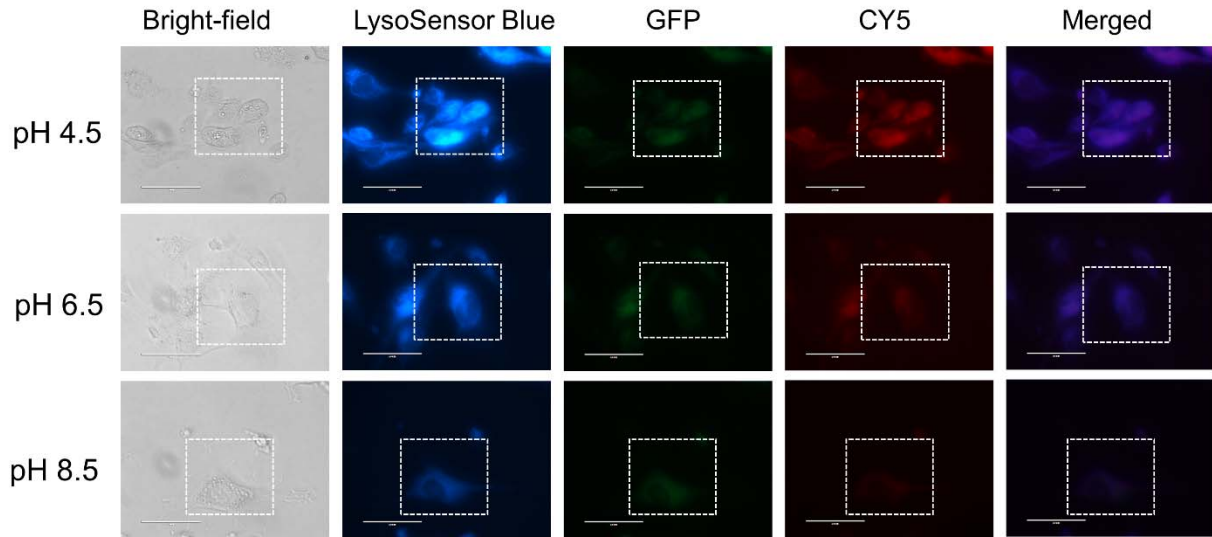

(b)

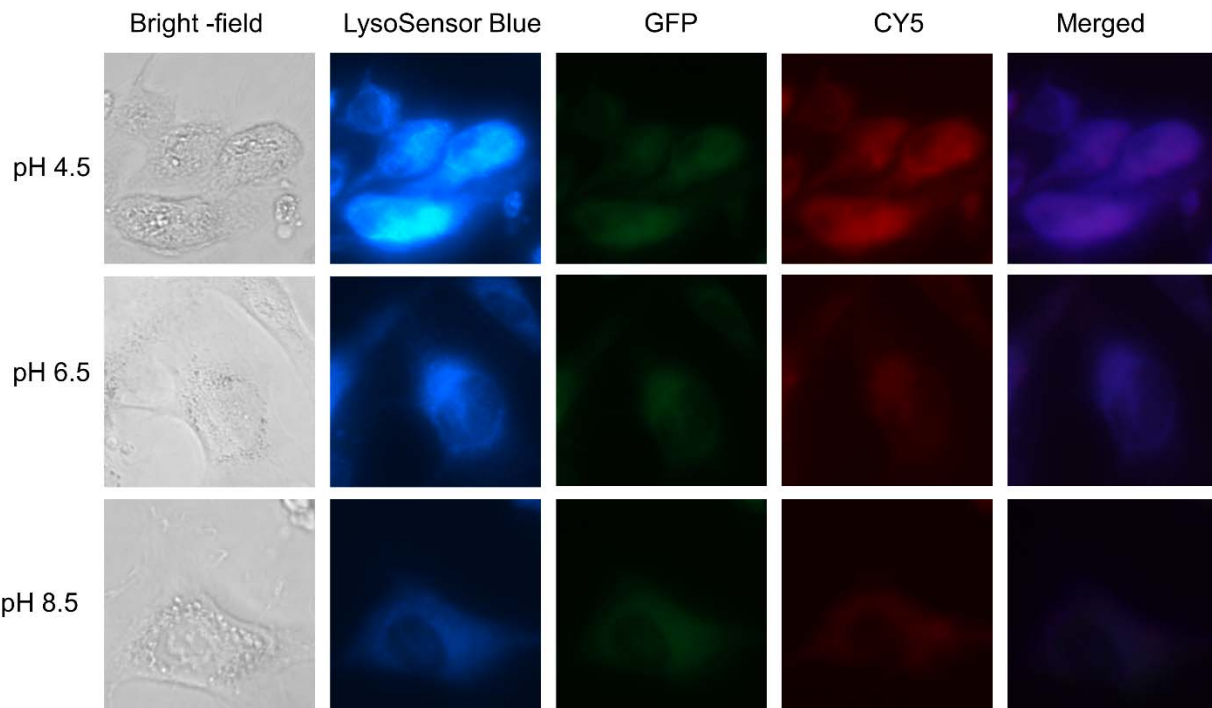

**Figure S39:** Enlarged fluorescence images of HUVEC-C cells incubated with 10  $\mu$ M fluorescent probe **B**. (a) HUVEC-C cells were incubated with 10  $\mu$ M probe **B** at different pH values ranging from pH 4.5 to 8.5 in presence of LysoSensor blue DND-167 (2  $\mu$ M) and nigericin. Images were acquired using the inverted fluorescence microscope (AMF-4306, EVOSfl, AMG) at 60X magnification. (b) Enlarged fluorescence images of HUVEC-C cells from figure (a).

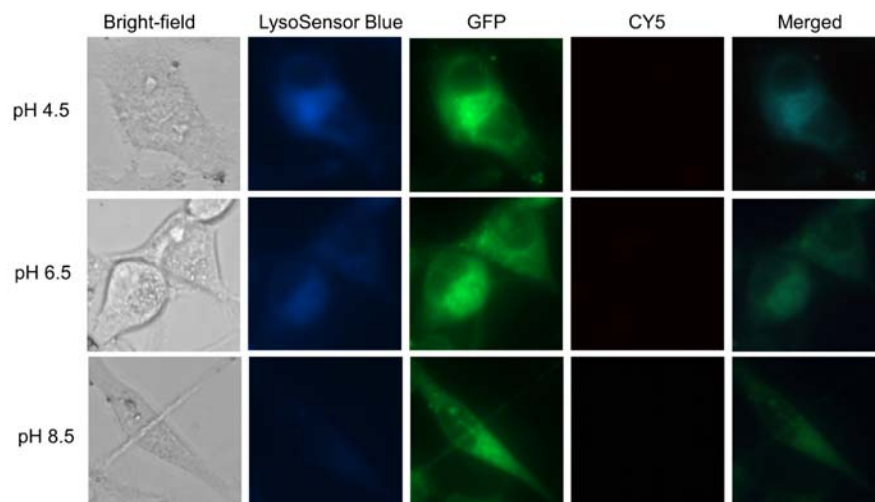

**Figure S40:** Enlarged fluorescence images of MDA-MB231 cells incubated with 10  $\mu$ M fluorescent probe **A**. MDA-MB231 cells were incubated with 10  $\mu$ M probe **A** at different pH values ranging from pH 4.5 to 8.5 in presence of LysoSensor blue DND-167 (2  $\mu$ M) and nigericin. Images were acquired using the inverted fluorescence microscope (AMF-4306, EVOSfl, AMG) at 60X magnification. The images taken at 60X were enlarged to observe the co-localization of probe with LysoSensor blue DND-167.

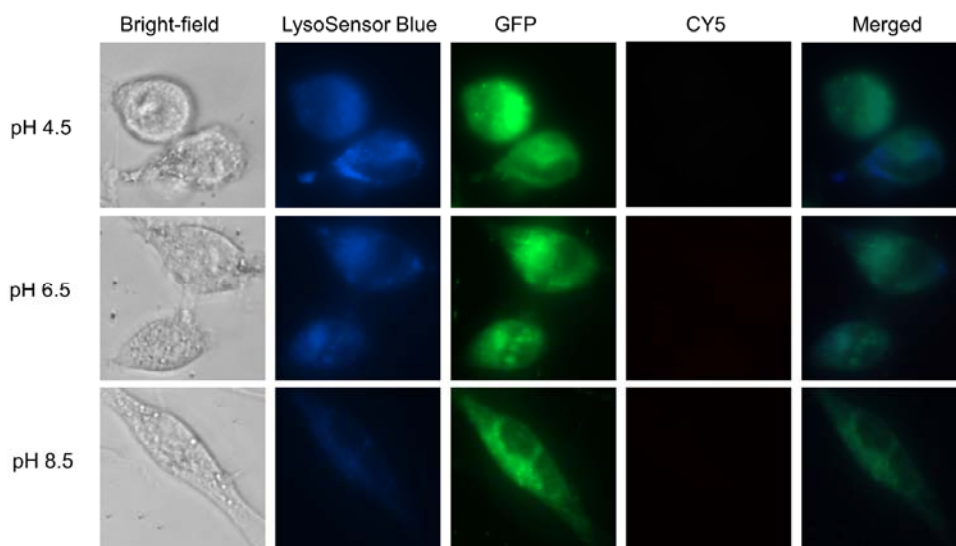

**Figure S41:** Enlarged fluorescence images of MDA-MB231 cells incubated with 10  $\mu$ M fluorescent probe **C**. MDA-MB231 cells were incubated with 10  $\mu$ M probe **C** at different pH values ranging from pH 4.5 to 8.5 in presence of LysoSensor blue DND-167 (2  $\mu$ M) and nigericin. Images were acquired using the inverted fluorescence microscope (AMF-4306, EVOSfl, AMG) at 60X magnification. The images taken at 60X were enlarged to observe the co-localization of probe with LysoSensor blue DND-167.

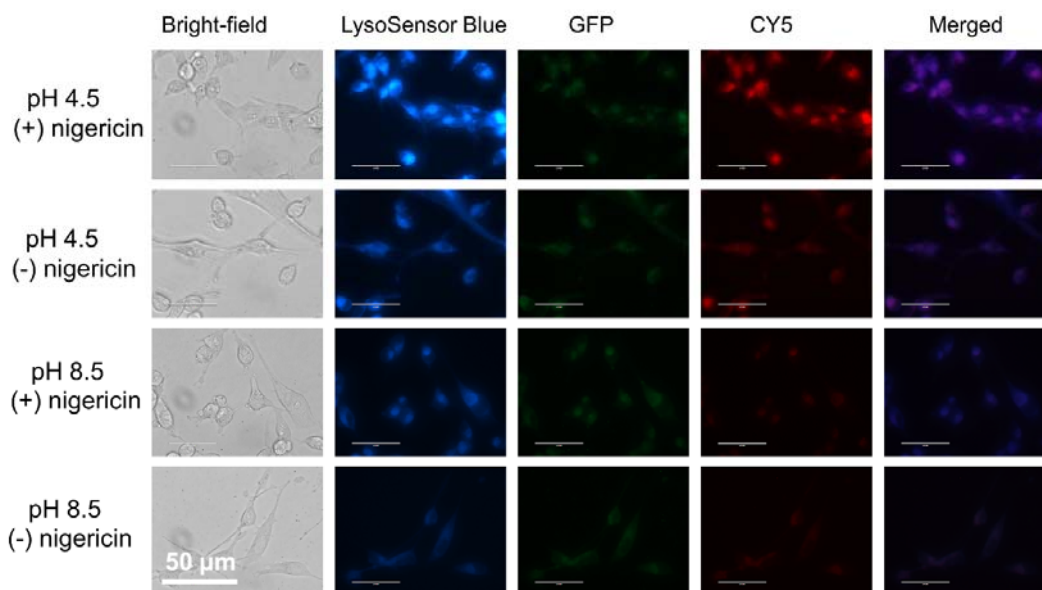

**Figure S42:** Fluorescence images of MDA-MB231 cells incubated with fluorescent probe **B**. MDA-MB231 cells were incubated with 10  $\mu$ M probe **B** at pH values 4.5 and 8.5 in presence of LysoSensor blue DND-167 (2  $\mu$ M) with and without nigericin. Images were acquired using the inverted fluorescence microscope (AMF-4306, EVOSfl, AMG) at 60X magnification.

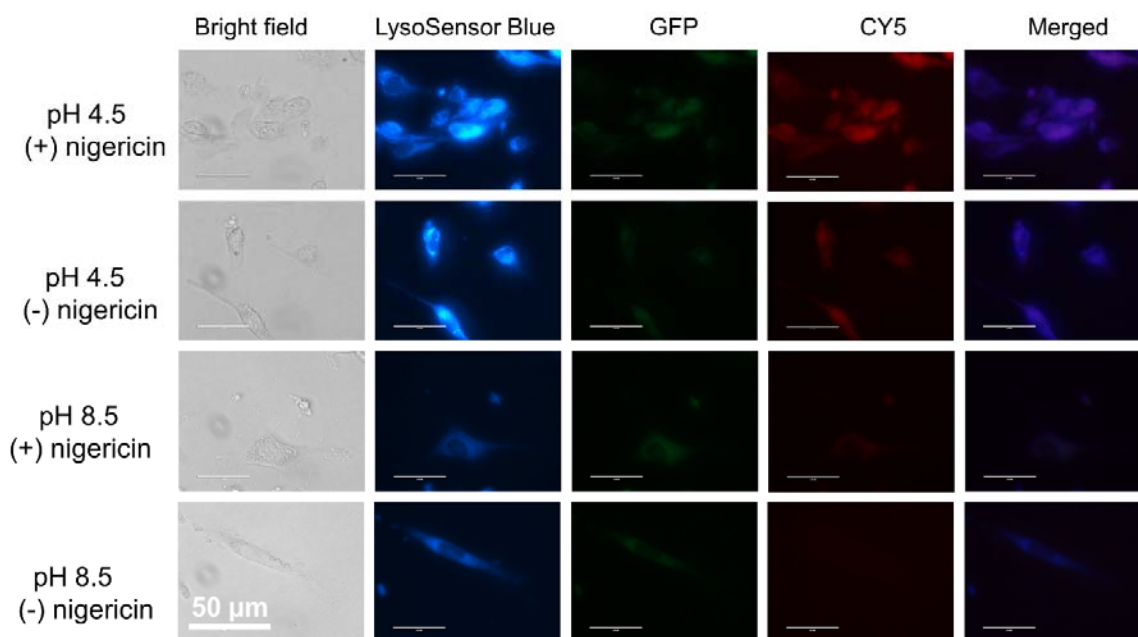

**Figure S43:** Fluorescence images of HUVEC-C cells incubated with fluorescent probe **B**. HUVEC-C cells were incubated with 10  $\mu$ M probe **B** at pH values 4.5 and 8.5 in presence of LysoSensor blue DND-167 (2  $\mu$ M) with and without nigericin. Images were acquired using the inverted fluorescence microscope (AMF-4306, EVOSfl, AMG) at 60X magnification.

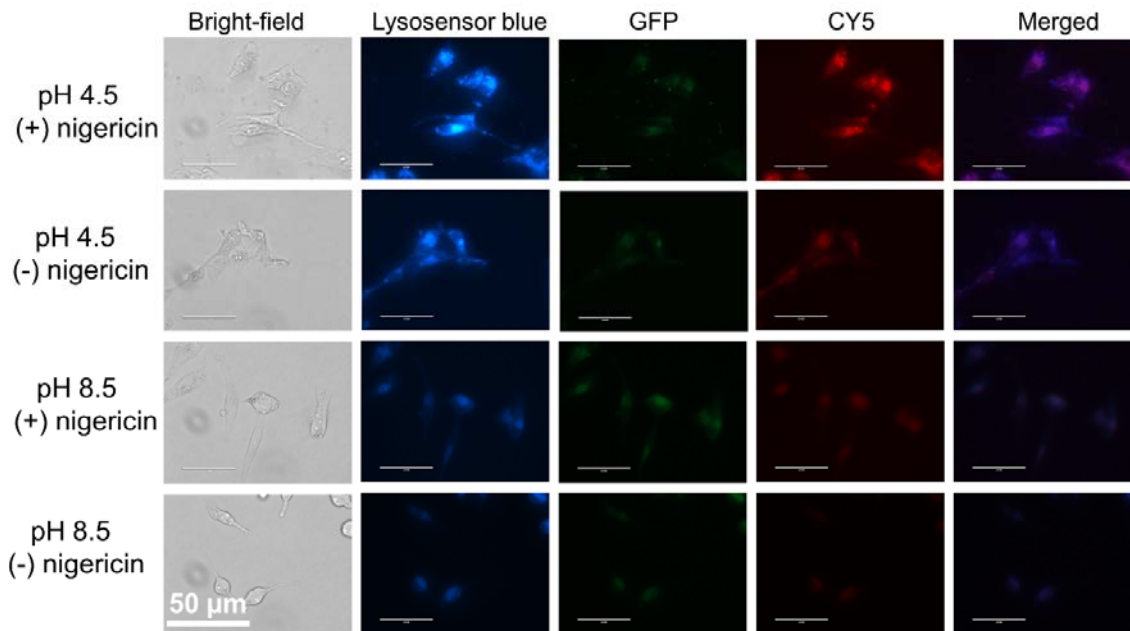

**Figure S44:** Fluorescence images of MDA-MB231 cells incubated with fluorescent probe E. MDA-MB231 cells were incubated with 10  $\mu$ M probe E at pH values 4.5 and 8.5 in presence of LysoSensor blue DND-167 (2  $\mu$ M) with and without nigericin. Images were acquired using the inverted fluorescence microscope (AMF-4306, EVOSfl, AMG) at 60X magnification.

## References

1. Albert M. Brouwer, Standards for photoluminescence quantum yield measurements in solution (IUPAC Technical Report), *Pure Appl. Chem.*, Vol. 83, No. 12, pp. 2213–2228, 2011. doi:10.1351/PAC-REP-10-09-31
2. Yuan, Lin, et al. "A unique class of near-infrared functional fluorescent dyes with carboxylic-acid-modulated fluorescence ON/OFF switching: rational design, synthesis, optical properties, theoretical calculations, and applications for fluorescence imaging in living animals." *J. Am. Chem. Soc.*, 134.2 (2012): 1200-1211.
3. Cielen, E.; Tahri, A.; Heyen, K. V.; Hoornaert, G. J.; De Schryver, F. C.; Boens, N., Synthesis and Spectroscopic Characterisation of Fluorescent Indicators for  $\text{Na}^+$  and  $\text{K}^+$ . *J. Chem. Soc. Perkin Trans.2*, 0(1998), 1573-1580.
